# Supplementary material
Source: PubMed Central journal article supplement (PMC4608024)

# Enantioselective Hydroformylation of 1-Alkenes with Commercial Ph-BPE Ligand

Zhiyong Yu, Meredith S. Eno, Alexandra H. Annis, and James P. Morken\*

*Department of Chemistry, Merkert Chemistry Center, Boston College, Chestnut Hill, MA 02647*

## Supporting Information

### Table of Contents

|                                                                             |         |
|-----------------------------------------------------------------------------|---------|
| <b>General Information</b> .....                                            | S2      |
| <b>Experimental Procedure</b>                                               |         |
| <b>I. Preparation of Terminal Olefins</b> .....                             | S3-S6   |
| <b>II. Preparation of Internal Cis-allyl Ether</b> .....                    | S7      |
| <b>III. Procedure of Asymmetric Hydroformylation Reactions</b> .....        | S8      |
| <b>IV. Characterization of AHF Products and Analysis of Stereochemistry</b> | S8-S22  |
| <b>Spectral Data</b> .....                                                  | S24-S40 |

## General Information:

$^1\text{H}$ -NMR spectra were recorded on a Varian Gemini-500 (500 MHz) spectrometer. Chemical shifts are reported in ppm with the solvent resonance as the internal standard ( $\text{CDCl}_3$ : 7.26 ppm). Data are reported as the following: chemical shift, integration, multiplicity (s = singlet, d = doublet, t = triplet, q = quartet, m = multiplet, app = apparent), and coupling constants (Hz). Coupling constants are reported to the nearest 0.5 Hz.  $^{13}\text{C}$  NMR spectra were recorded on a Varian Gemini-500 (125 MHz) spectrometer with complete proton decoupling. Chemical shifts are reported in ppm with the solvent resonance as the internal standard ( $\text{CDCl}_3$ : 77.23 ppm). Infrared (IR) spectra were recorded on a Burkert alpha spectrophotometer,  $\nu_{\text{max}}$   $\text{cm}^{-1}$ . Bands are characterized as broad (br), strong (s), medium (m), and weak (w). High-resolution mass spectrometry (ESI) was performed at the Mass Spectrometry Facility, Boston College.

Liquid Chromatography was performed using forced flow (flash chromatography) on silica gel ( $\text{SiO}_2$ , 230 $\times$ 450 Mesh) purchased from Silicycle. Thin Layer Chromatography was performed on 25  $\mu\text{m}$  silica gel plates purchased from Silicycle. Visualization was performed using ultraviolet light (254 nm), potassium permanganate ( $\text{KMnO}_4$ ) in water, 2,4-dinitrophenylhydrazine (2,4-DNP) in water/ethanol or phosphomolybdic acid (PMA) in ethanol. Optical rotations were measured on a Rudolph Analytical Research Autopol IV Polarimeter. Analytical chiral supercritical fluid chromatography (SFC) was performed on a TharSFC Method Station II equipped with Waters 2998 Photodiode Array Detector.

All reactions were conducted in oven- or flame-dried glassware under an inert atmosphere of nitrogen or argon. Tetrahydrofuran (THF), toluene, diethyl ether ( $\text{Et}_2\text{O}$ ) and dichloromethane (DCM) were purified using a Pure Solv MD-4 solvent purification system from Innovative Technology Inc. by passing through two activated alumina columns after being purged with argon. Hydroformylation reactions were performed in an Argonaut Technologies Endeavor<sup>®</sup> Catalyst Screening System or 100-600 mL pressure vessel by Parr Instrument Company with a gage block using 1:1  $\text{H}_2/\text{CO}$  supplied by Airgas, Inc. (Acetylacetonato)dicarbonylrhodium (I)  $[\text{Rh}(\text{acac})(\text{CO})_2]$  and (-)-1,2-Bis((2*R*,5*R*)-2,5-diphenylphospholano)ethane [(*S,S*)-Ph-BPE] were purchased from Strem Chemicals, Inc. and used without further purification. All other reagents were purchased from Aldrich, Alfa Aesar, or Fisher and used without further purification.

## I. Preparation of Terminal Olefins

### Preparation of (Allyloxy)(tert-butyl)dimethylsilane

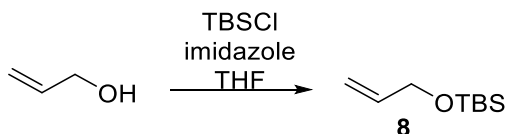

*t*-Butyldimethylsilylallylether **8** (Table 1, entry 1) was prepared using a known procedure and all spectral data are in accordance with literature report.<sup>1</sup>

### Preparation of 1-((allyloxy)methyl)-4-methoxybenzene

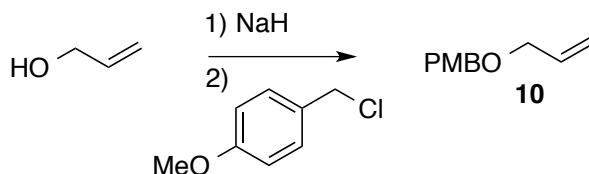

*para*-Methoxybenzyl allyl ether **10** (Table 1, entry 3) was prepared using a known procedure and all spectral data are in accordance with the literature report.<sup>2</sup>

### Preparation of 5,5-dimethyl-2-vinyl-1,3-dioxane

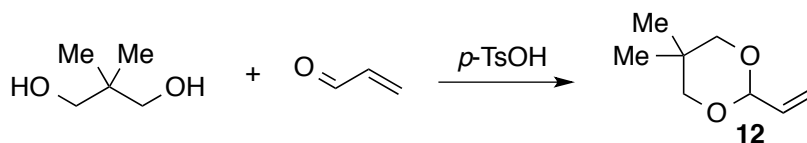

Acetal **12** (Table 1, entry 5) was prepared using a known procedure and all spectral data are in accordance with the literature report.<sup>3</sup>

### Preparation of 3-vinyl-1,5-dihydrobenzo[*e*][1,3]dioxepine.

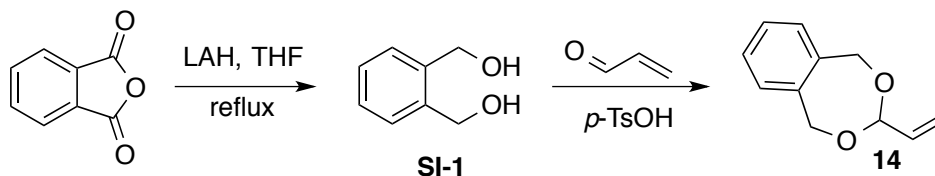

1,2-Benzenedimethanol **SI-1** was prepared according to a literature procedure.<sup>4</sup>

Diol **SI-1** (3.3 g, 23.9 mmol) and catalytic (approximately 10 mg) *p*-TsOH were dissolved in dry CH<sub>2</sub>Cl<sub>2</sub> (12 mL) in a 50 mL round bottom flask, and stirred with MgSO<sub>4</sub> under nitrogen. Acrolein (1.59 mL, 23.9 mmol) was added dropwise to the mixture at room temperature and stirred overnight. The resulting mixture was filtered and

<sup>1</sup> Su, C. C.; Williard, P. G. *Org. Lett.* **2010**, *12*, 5378.

<sup>2</sup> Chênevert, R.; Dasser, M. *J. Org. Chem.* **2000**, *65*, 4529.

<sup>3</sup> Doumèche, B.; Archelas, A.; Furstoss, R. *Adv. Synth. Catal.* **2006**, *348*, 1948.

<sup>4</sup> Steffen, J.; Lei, X. G.; Li, W.; Liu, Z. Q.; Turro, N. J.; Ottaviani, M. F.; Abrams, L. *J. Org. Chem.* **2002**, *67*, 2606.

concentrated. The residue was purified by silica gel chromatography to afford the titled compound **14** (Table 1, entry 6) as a colorless oil (3.3 g, 79% yield). All spectral data are in accordance with literature report.<sup>5</sup>

**Preparation of 4-methyl-1-vinyl-2,6,7-trioxabicyclo[2.2.2]octane**

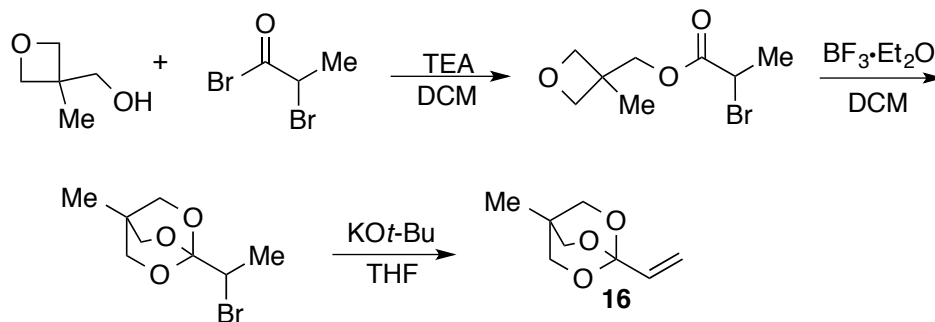

Vinyl-trioxobicyclo[2.2.2.]octane **16** (Table 1, entry 6) was prepared using a known sequence from commercially available 3-methyl-3-oxetanemethanol and all spectral data are in accordance with the literature.<sup>6</sup>

**Preparation of (but-3-en-1-yloxy)(tert-butyl)dimethylsilane**

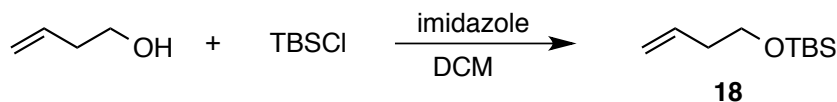

Homoallylether **18** (Table 2, entry 1) was prepared using a known a procedure and all spectral data are in accordance with the literature.<sup>7</sup>

**Preparation of 1-((but-3-en-1-yloxy)methyl)-4-methoxybenzene (20)**

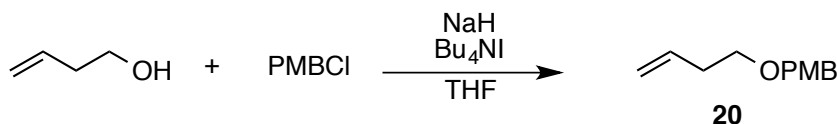

Homoallylether **20** (Table 2, entry 2) was prepared using known procedure and all spectral data are in accordance with the literature report.<sup>8</sup>

**Preparation of 3-buten-1-yl acetate (22)**

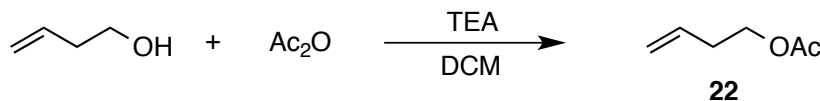

Homoallyl acetate **22** (Table 2, entry 3) was prepared by a known procedure and all spectral data are in accordance with the literature report.<sup>9</sup>

<sup>5</sup> Arab, K. E.; Hanan, A. Q.; Patrick, M. H. *J. Organomet. Chem.* **2002**, 656, 168.

<sup>6</sup> Risi, R. M.; Burke, S. D. *Org. Lett.* **2012**, 14, 2572.

<sup>7</sup> Ghosh, A. K.; Li, J. -F. *Org. Lett.* **2009**, 11, 4164.

<sup>8</sup> Raghavan, S.; Krishnaiah, V. *J. Org. Chem.* **2010**, 75, 748.

**Preparation of but-3-en-1-yl benzoate (24)**

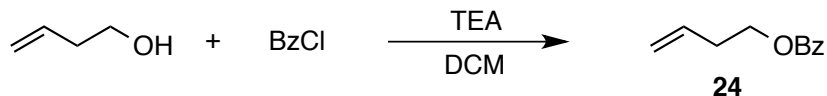

Homoallyl benzoate **24** (Table 2, entry 4) was prepared by a known procedure and all spectral data are in accordance with the literature report.<sup>10</sup>

**Preparation of 2-(but-3-en-1-yloxy)tetrahydro-2H-pyran (26)**

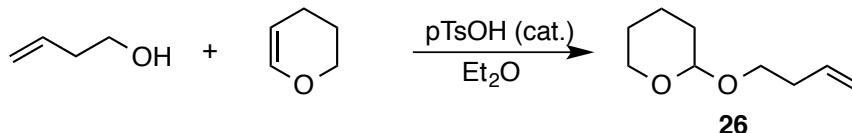

Tetrahydropyran **26** (Table 2, entry 5) was prepared using a known procedure and all spectral data are in accordance with the literature report.<sup>11</sup>

**Preparation of but-3-en-1-yl 2,2,2-trifluoroacetate (28)**

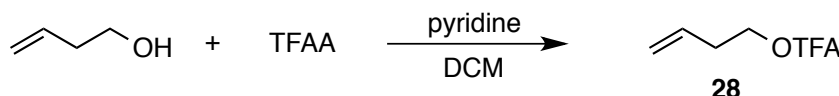

To a 25 mL round bottom flask equipped with a stir bar, was added 3-buten-1-ol (0.65 mL, 7.5 mmol) followed by dichloromethane (7.5 mL). The reaction was cooled to 0 °C in an ice bath and charged with pyridine (1.20 mL, 15.0 mmol) followed by drop-wise addition of trifluoroacetic anhydride (1.79 mL, 12.75 mmol). The reaction was allowed to stir at 0 °C for 14 hours. The reaction was then diluted with deionized water (10 mL) and extracted twice with diethyl ether (5 mL), the organic layers were combined and washed with 1M HCl (2 x 5 mL), saturated aqueous NaHCO<sub>3</sub>, and saturated aqueous NaCl. The organic layer was then dried over anhydrous sodium sulfate and concentrated *in vacuo*. The crude product was purified by Kugelrohr distillation under N<sub>2</sub> at 100 °C to afford a light yellow oil (1.11g, 94 % yield).

CC=CCOC(=O)C(F)(F)F **But-3-en-1-yl 2,2,2-trifluoroacetate (28, Table 2):** <sup>1</sup>H NMR (500 MHz, CDCl<sub>3</sub>): δ 5.77 (1H, ddt, *J* = 17.0 Hz, 10.0 Hz, 7.0 Hz), 5.18 (1H, q, *J* = 1.5 Hz), 5.16-5.13 (1H, m), 4.40 (2H, t, *J* = 7.0 Hz), 2.50 (2H, dq, *J* = 7.0 Hz, 1.0 Hz); <sup>13</sup>C NMR (150 MHz, CDCl<sub>3</sub>): δ 157.5 (q, *J* = 157.5), 132.3, 118.5, 114.5 (q, *J* = 283.9), 66.9, 32.5; <sup>19</sup>F (470 Hz, CDCl<sub>3</sub>): δ -75.2; IR (neat): 2958 (m), 2925 (s), 2871 (m), 2854 (m), 1734 (s), 1458 (m), 1262 (m), 1163 (m), 1029 (w) cm<sup>-1</sup>; HRMS-(ESI+) for C<sub>6</sub>H<sub>8</sub>F<sub>3</sub>O<sub>2</sub> [M+H]<sup>+</sup>: calculated: 168.0476, found 167.0471.

<sup>9</sup> Fürstner, A.; Müller, T. *Synlett*. **1997**, 1997, 1010.

<sup>10</sup> Zhang, M.; Vedanthan, P.; Flynn, D. L.; Hanson, P. R. *J. Org. Chem.* **2004**, *69*, 8340.

<sup>11</sup> Hernandez, D.; Nielsen, L.; Lindsay, K. B.; Lopez-Garcia, A.; Bjerglund, K.; Skrydstrup, T.; *Org. Lett.* **2010**, *12*, 3528.

### Preparation of but-3-enoic acid tert-butyl ester (**30**)

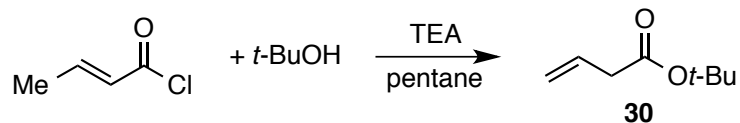

*t*-Butyl ester **30** (Table 2, entry 7) was prepared using a known procedure and all spectral data are in accordance with the literature report.<sup>12</sup>

### Preparation of 1-phenyl-but-3-en-1-one (**32**)

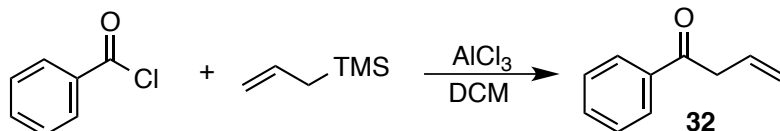

To an oven dried 50 mL round bottom flask with stir bar was added aluminum chloride (730.0 mg, 5.5 mmol). The flask was capped with a septa and purged with N<sub>2</sub>. To this was added dichloromethane (20 mL) followed by dropwise addition of benzoyl chloride (0.58 mL, 5.0 mmol). The reaction was allowed to stir for 20 minutes prior to dropwise addition of allyltrimethylsilane (0.96 mL in 2.0 mL dichloromethane, 6.0 mmol). The reaction was allowed to stir for 4 hours at room temperature. The reaction mixture was quenched with ice-cold deionized water and washed three times with dichloromethane. The organic layers combined, dried over magnesium sulfate, concentrated *in vacuo* and purified on silica gel (30:1 pentane: diethyl ether) to afford **32** as a clear, colorless oil (866.4 mg, quantitative yield) (Table 2, entry 3). R<sub>f</sub> = 0.31 (30:1 pentane: diethyl ether, stain in KMnO<sub>4</sub>). All spectral data are in accordance with the literature.<sup>13</sup>

### Preparation of (1,1-dimethylethyl)(dimethyl)(4-penten-1-yloxy)silane (**34**)

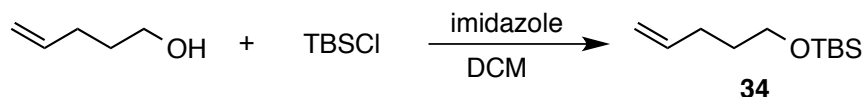

Bishomoallyl ether **34** (Table 2, entry 4) was prepared using literature procedure and all spectral data are in accordance with literature.<sup>14</sup>

<sup>12</sup> Ramachandran, P.V.; Nicponski, D.; Kim, B. *Org. Lett.* **2013**, *15*, 1398.

<sup>13</sup> Moriyama, K.; Takemura, M.; Togo, H. *J. Org. Chem.* **2014**, *79*, 6094.

<sup>14</sup> (a) Kovtonyuk, V.N.; Kobrina, L.S.; Gatilov, Y.V.; Bagryanskaya, I.Y.; Fröhlich, R.; Haufe, G. *J. Chem. Soc., Perkin Trans. 1* **2000**, 1929. (b) Kwan, E.E.; Scheerer, J.R.; Evans, D.A. *J. Org. Chem.* **2013**, *78*, 175.

## II. Preparation of *p*-Methoxybenzyl *cis*-2-pentenyl ether (**36**)

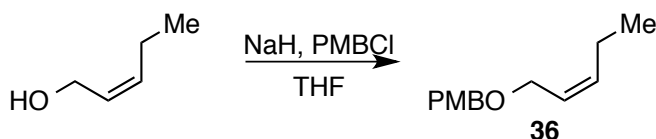

A flamed dried 100 mL round bottom flask with stir bar was charged with NaH (360 mg, 15 mmol) and 20 mL THF under N<sub>2</sub>. After cooling to 0°C, *cis*-2-penten-1-ol (1.1 mL, 11 mmol) was added dropwise *via* syringe, which was allowed to stir at 0°C for 45 min. Then Bu<sub>4</sub>NI (50 mg, catalytic) and PMBCl (1.4 mL, 10 mmol) were added sequentially at 0°C, and the solution was allowed to warm to room temperature and stir overnight. The reaction was quenched with NH<sub>4</sub>Cl aqueous solution and the layers were separated. The aqueous layer was extracted with EtOAc (3 × 20 mL), and the combined organics were dried over Na<sub>2</sub>SO<sub>4</sub>, filtered, and concentrated by rotary evaporation. The crude reaction mixture was purified by silica gel chromatography (diethyl ether : hexanes = 1:10) to afford **36** as a clear, colorless oil. R<sub>f</sub> = 0.53 (6:1 hexanes: diethyl ether, stain in KMnO<sub>4</sub>).

**(Z)-1-Methoxy-4-((pent-2-en-1-yloxy)methyl)benzene (Scheme 4, **36**).** <sup>1</sup>H NMR (500 MHz, CDCl<sub>3</sub>): δ 7.27 (2H, d, *J* = 9.5 Hz), 6.88 (2H, d, *J* = 9.0 Hz), 5.60-5.54 (2H, m), 4.44 (2H, s), 4.04 (2H, d, *J* = 6.0 Hz), 3.81 (3H, s), 2.06 (2H, quin, *J* = 7.5 Hz), 0.97 (3H, t, *J* = 7.5 Hz); <sup>13</sup>C NMR (125 MHz, CDCl<sub>3</sub>): δ 159.4, 135.6, 130.8, 129.6, 125.7, 114.0, 71.9, 65.5, 55.5, 21.1, 14.4; IR (neat): 3011 (w), 2836 (w), 1613 (m), 1513 (s), 1463 (w), 1302 (m), 1247 (s), 1172 (m), 1082 (s), 1036 (s), 820 (s) cm<sup>-1</sup>.

### III. Procedure of Asymmetric Hydroformylation Reactions

**Representative Procedure A:** (Argonaut Technologies Endeavor®, 0.5% catalyst loading): Reactions were conducted in an Argonaut Endeavor® reactor system which has eight reactor wells. Each well to be used was charged with approximately 0.5 mL of toluene in an oven dried glass vial. The Endeavor was sealed and purged with nitrogen (4 x 100 psi). Meanwhile an oven-dried two dram-vial in dry box under an argon atmosphere was charged with alkene (1.0 mmol) and 0.5 mL of toluene followed by 0.5 mL of a rhodium/ligand stock solution (0.010 M Rh(acac)(CO)<sub>2</sub>/0.011M (*S,S*)-PhBPE in toluene). The reaction mixture was then taken up in a syringe, removed from dry box and injected into the Endeavor. After injection the Endeavor was purged with nitrogen (1 x 100 psi), stirred at 250 rpm, and heated to 80 °C for 10 min. Stirring was stopped and the Endeavor charged with 150 psi of syngas (1:1 CO/H<sub>2</sub>), stirring was brought to 700 rpm and heated to desired reaction temperature (80 °C). When the reaction was complete (indicated by syngas uptake) the Endeavor was vented, cooled and the vials were removed before the solvent evaporated *in vacuo*.

**Representative Procedure B:** (Parr Reactor, 0.5% catalyst loading): To an oven-dried two dram vial with stir bar in dry box under an argon atmosphere was added alkene (1.0 mmol) and 0.5 mL of toluene. The vial was then charged with 0.5 mL of a rhodium/ligand stock solution (0.010 M Rh(CO)<sub>2</sub>acac/0.011M (*S,S*)-PhBPE in toluene) and sealed with a septum cap and removed from dry box. At this time the reaction vial was brought to the pressure vessel and the septa cap pierced with a 22-gauge sterile needle and then the reactor was sealed and pressurized with 500 psi of Synthesis gas (1:1 CO/H<sub>2</sub>). Once pressurized the gas was slowly allowed to vent until the parr reactor gauge read 0 psi, the parr reactor was then pressurized and vented two more times in the same manner before pressurizing to the final desired reaction pressure. Following this purging process the parr reaction was placed in an oil bath, heated to the desired temperature and allowed to stir at 800 rpm for the desired reaction time. At the end of the reaction the oil bath was removed and parr reactor allowed to cool and then placed in an ice bath before venting. The vial was removed and the solvent evaporated *in vacuo*.

### IV. Characterization of Reaction Products and Analysis of Stereochemistry

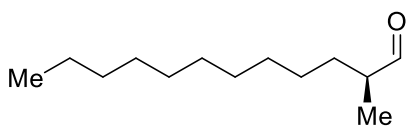

**(S)-2-Methyldodecanal (6, Scheme 2):** The title compound was prepared *via* Representative Procedure A with 1-dodecene **5**. The crude reaction mixture was purified on silica gel (100% pentane to 40:1 pentane:



diethyl ether) to afford a clear, colorless oil (mixture of branched and linear isomers, 196 mg, 99% yield).  $R_f = 0.07$  (40:1 pentane: diethyl ether, stain in 2,4-DNP).  $[\alpha]_D^{22} = +38.667$  ( $c = 0.421$ ,  $\text{CHCl}_3$ ,  $l = 50$  mm). Spectral data are in accordance with literature.<sup>15</sup>

### Analysis of Stereochemistry:

The titled compound **6** was subjected to  $\text{NaBH}_4$  reduction followed by benzoate protection, as depicted below. The analogous racemic material was prepared *via* the same route, using triphenylphosphine as achiral ligand in the hydroformylation reaction. Optical purity was determined by SFC analysis of the derived benzoate. Absolute stereochemistry was determined by analogy to the optical rotation of (*S*)-2-methyldecanal reported in the literature.<sup>16</sup>

optically pure sample

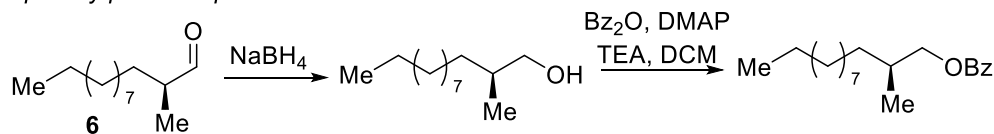

racemic sample

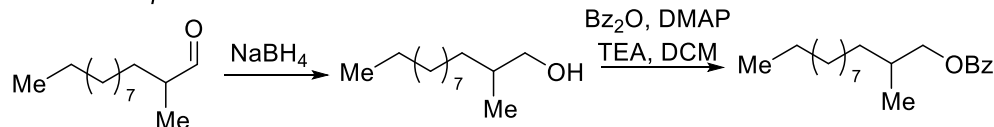

Chiral SFC (Chiralpak, AD-H, 35 °C, 3 mL/min, 2% mixed solvent (Isopropanol:hexane = 1:1) 100 bar, 210-270 nm) – analysis of benzoate.

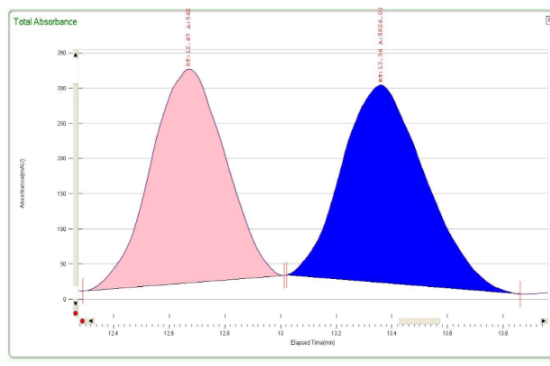

Enantioenriched Sample

| Peak Info |         |            |          |
|-----------|---------|------------|----------|
| Peak No   | % Area  | Area       | RT (min) |
| 1         | 49.1023 | 5620.4964  | 12.67    |
| 2         | 50.8977 | 5826.0112  | 13.36    |
| Total:    | 100     | 11446.5076 |          |

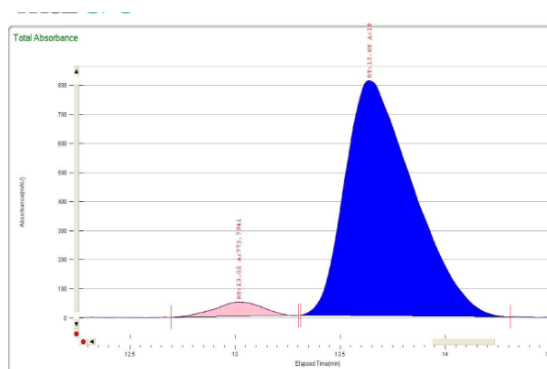

Racemic Sample

| Peak Info |        |            |          |
|-----------|--------|------------|----------|
| Peak No   | % Area | Area       | RT (min) |
| 1         | 4.057  | 773.7941   | 13.02    |
| 2         | 95.943 | 18299.1306 | 13.64    |
| Total:    | 100    | 19072.9247 |          |

<sup>15</sup> Wakabayashi, T.; Mori, K.; Kobayashi, S. *J. Am. Chem. Soc.* **2001**, *123*, 1372.

<sup>16</sup> Oppolzer, W.; Darcel, C.; Rochet, P.; Rosset, S.; Brabander, J. D. *Helv. Chim. Acta* **1997**, *80*, 1319.

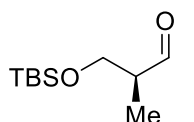

**(S)-3-((tert-Butyldimethylsilyloxy)-2-methylpropanal. (9, Table 1).**

Representative procedure A was used with the following modifications. Olefin **8** (7.7 g, 45 mmol), Rh(acac)(CO)<sub>2</sub> (4.6 mg, 0.018 mmol), (*S,S*)-Ph-BPE (17.4 mg, 0.022 mmol) and toluene (5.1 mL). The reaction was stopped with full conversion observed after 8 h. The crude reaction mixture was purified on silica gel (hexane: diethyl ether = 20:1) to afford a clear colorless oil (6.54 g, 72% yield).  $[\alpha]_D^{21} = +31.942$  ( $c = 0.72$ , CHCl<sub>3</sub>,  $l = 50$  mm). All spectral data are in accordance with literature.<sup>17</sup>

**Analysis of Stereochemistry**

The titled compound **9** was converted to the corresponding *p*-methoxybenzyl ether as shown below. The resulting benzyl ether was compared to racemic material prepared from 2-methyl-propan-1,3-diol. Absolute stereochemistry was assigned by comparing optical rotation to literature  $[\alpha]_D^{22} = +19.5$  ( $c = 1.00$ , CHCl<sub>3</sub>,  $l = 50$  mm).<sup>17</sup>

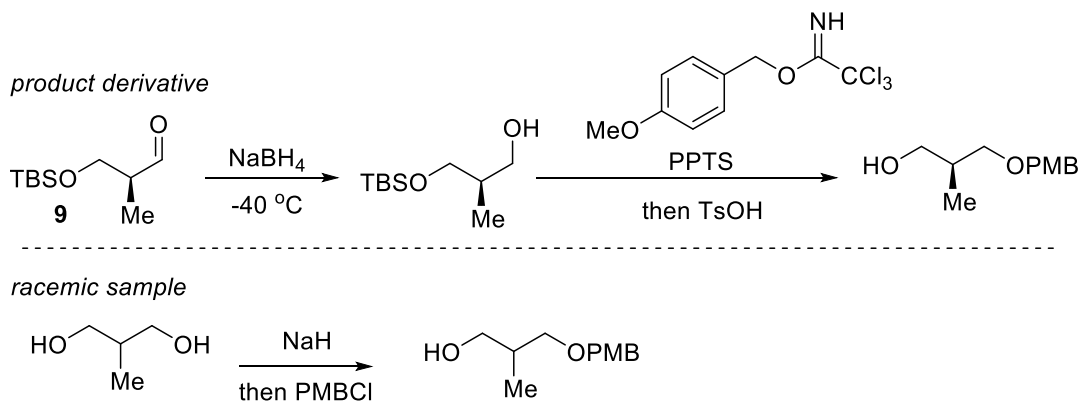

Chiral HPLC (Chiralpak, AD-H, 25 °C, 3 mL/min, 5% Isopropanol in hexane, 220 nm) – analysis of benzyl ether.

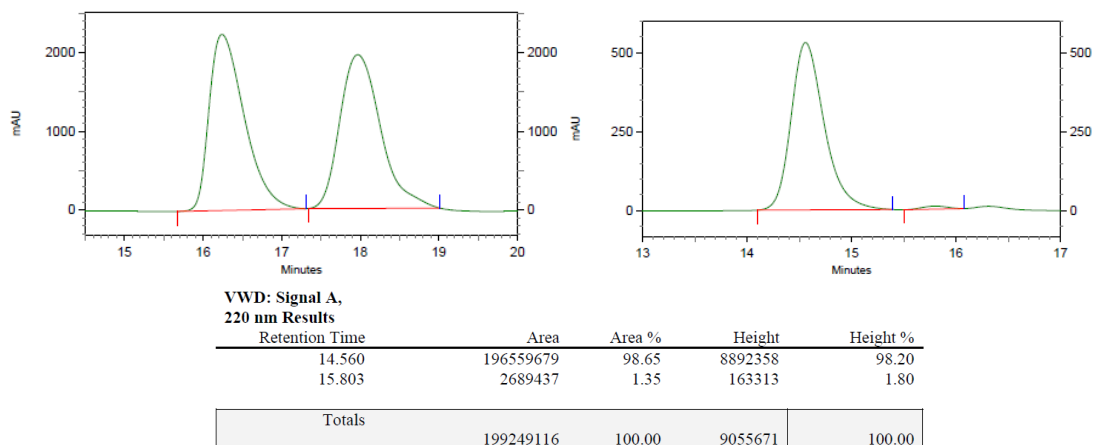

<sup>17</sup> Altendorfer, M.; Raja, A.; Sasse, F.; Irschick, H.; Menche, D. *Org. Biomol. Chem.* **2013**, *11*, 2116.

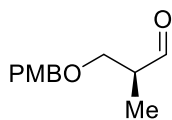
**(S)-3-((4-Methoxybenzyl)oxy)-2-methylpropanal (11, Table 1).** The title compound was prepared *via* representative procedure **B** using olefin **10**. The crude reaction mixture was purified on silica gel (2:1 pentane: diethyl ether) to afford a clear, colorless oil (136 mg, 78% yield).  $R_f = 0.78$  (1:1 pentane: diethyl ether, stain in  $\text{KMnO}_4$ ).  $[\alpha]_D^{21} = +28.886$  ( $c = 0.72$ ,  $\text{CHCl}_3$ ,  $l = 50$  mm). All spectral data are in accordance with literature report.<sup>17</sup>

### Analysis of Stereochemistry:

The titled compound **11** was reduced to the corresponding *p*-methoxybenzyl ether as shown below. The resulting benzyl ether was compared to racemic material prepared from 2-methyl-1,3-propanediol as shown below. Absolute stereochemistry was assigned by comparing optical rotation to literature  $[\alpha]_D^{22} = +30.5$  ( $c = 1.00$ ,  $\text{CHCl}_3$ ).<sup>17</sup>

*optically pure sample*

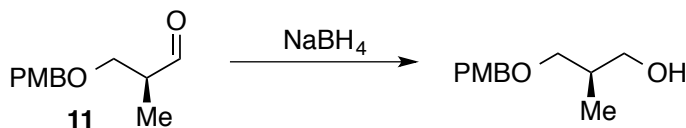

*racemic sample*

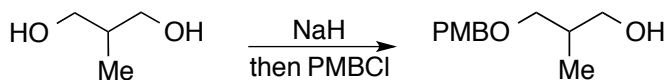

*Chiral HPLC (Chiralpak, AD-H, 25 °C, 3 mL/min, 5% Isopropanol in hexane, 220 nm) – analysis of benzyl ether.*

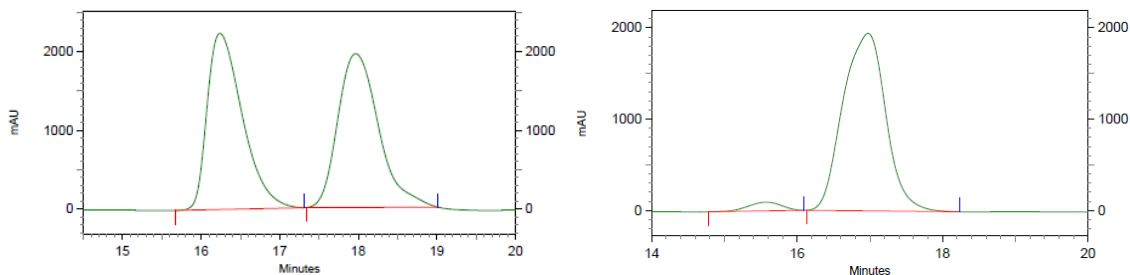

VWD: Signal A,  
220 nm Results

| Retention Time | Area       | Area % | Height   | Height % |
|----------------|------------|--------|----------|----------|
| 15.573         | 50852879   | 3.68   | 1602594  | 4.69     |
| 16.977         | 1332416422 | 96.32  | 32587530 | 95.31    |
| Totals         | 1383269301 | 100.00 | 34190124 | 100.00   |

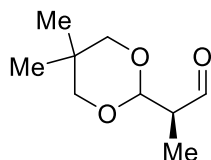

**(R)-2-(5,5-Dimethyl-1,3-dioxan-2-yl)propanal (13, Table 1).** The title compound was prepared *via* representative procedure **B** using olefin **12**. The crude reaction mixture was purified on silica gel (4:1 pentane: diethyl ether) to afford a yellow oil (157 mg, 92% yield).  $R_f = 0.57$  (4:1 pentane: diethyl ether, stain in  $\text{KMnO}_4$ )  $[\alpha]_D^{21} = +53.630$  ( $c = 0.88$ ,  $\text{CHCl}_3$ ,  $l = 50$  mm). All spectral data are in accordance with literature report.<sup>18</sup>

#### ***Analysis of Stereochemistry:***

The titled compound **13** was compared to racemic material. Absolute stereochemistry was assigned by analogy.

*racemic sample*

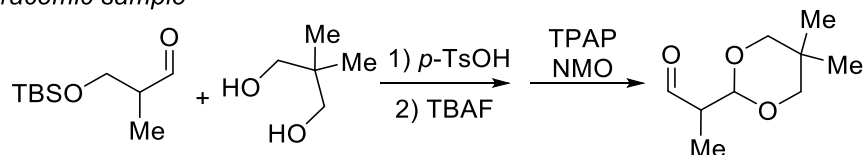

**Chiral GC ( $\beta$ -dex-120, supelco, 100 °C, 20 psi)-analysis of 13.**

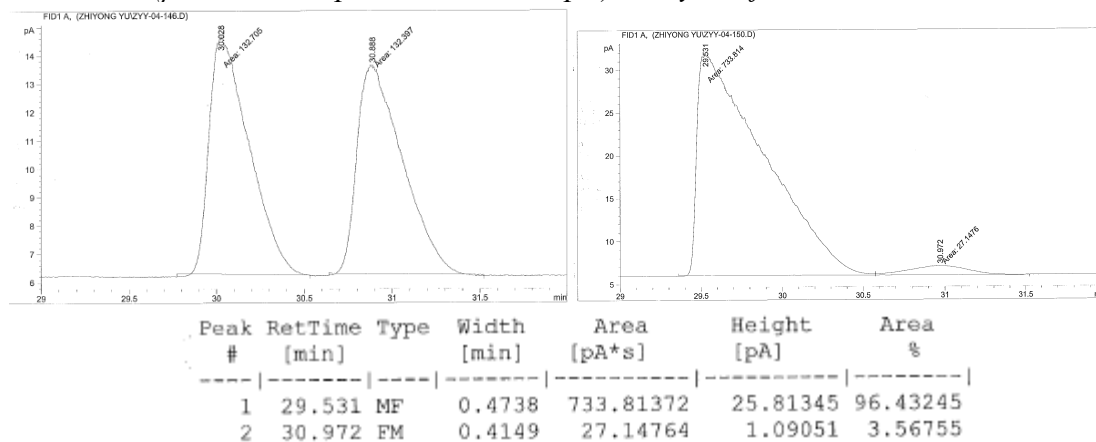

<sup>18</sup> Tanaka, K.; Fujimori, Y.; Saikawa, Y; Nakata, M. *J. Org. Chem.* **2008**, *73*, 6292.

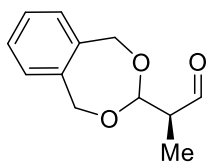

**(R)-2-(1,5-Dihydrobenzo[e][1,3]dioxepin-3-yl)propanal (15, Table 1).** The title compound was prepared *via* representative procedure **B** using olefin **14**. The crude reaction mixture was purified on silica gel (4:1 pentane: diethyl ether) to afford a white solid (185 mg, 90% yield).  $R_f = 0.17$  (4:1 pentane: diethyl ether, stain in CAM).  $[\alpha]_D^{21} = +46.492$  ( $c = 0.90$ ,  $\text{CHCl}_3$ ,  $l = 50$  mm). All spectral data are in accordance with the literature.<sup>19</sup>

**Analysis of Stereochemistry:**

The titled compound **15** was converted to the corresponding alcohol as shown below. The resulting alcohol was compared to racemic material prepared from racemic aldehyde as shown below. Absolute stereochemistry was assigned by analogy.

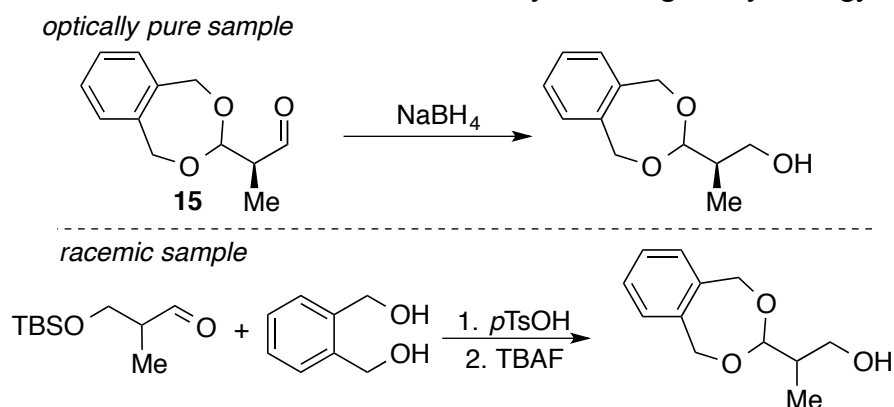

*Chiral SFC (Chiralpak, AS-H, 35 °C, 5 mL/min, 5% Isopropanol, 100 bar, 210-270 nm) – analysis of alcohol.*

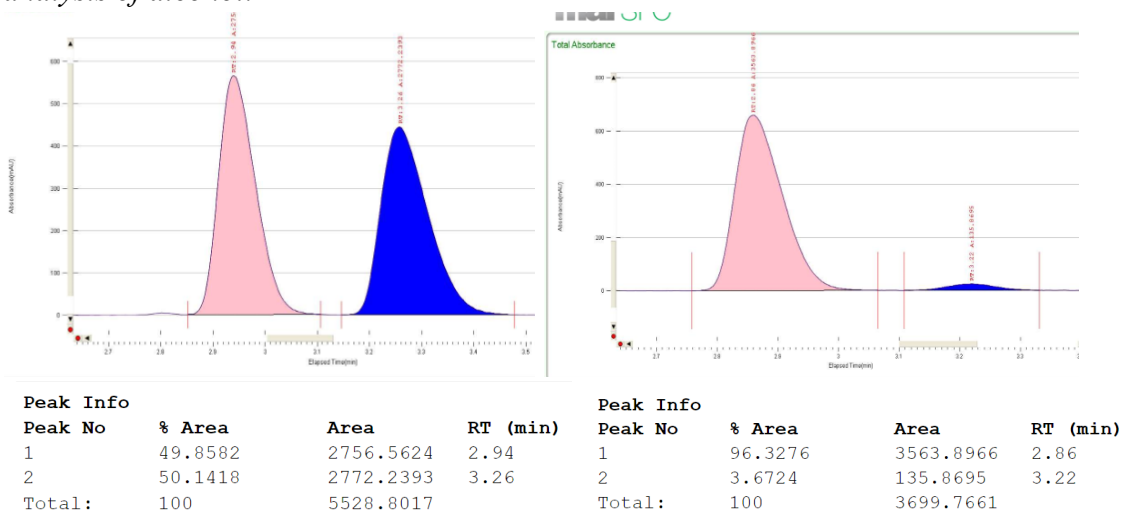

<sup>19</sup> Yu, Z., -Y., Ely, R. J.; Morken, J. P. *Angew. Chem. Int. Ed.* **2014**, *53*, 9632.

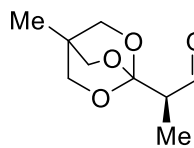

**(R)-2-(4-Methyl-2,6,7-trioxabicyclo[2.2.2]octan-1-yl)propanal (17, Table 1).** The title compound was prepared *via* representative procedure **B** using olefin **16**. The crude reaction mixture was purified on silica gel (1:1 pentane: diethyl ether) to afford a white solid (185 mg, 90% yield).  $R_f=0.8$  (1:1 pentane: diethyl ether, stain in 2,4-DNP).  $[\alpha]_D^{21} = +65.933$  ( $c = 0.72$ ,  $\text{CHCl}_3$ ,  $l = 50$  mm). All spectral data are in accordance with literature report.<sup>20</sup>

### Analysis of Stereochemistry:

The titled compound **17** was converted to corresponding *p*-methoxybenzyl ether as shown below. The resulting benzyl ether was compared to racemic material prepared from 2-methyl-1,3-propanediol as shown below.

*optically pure sample*

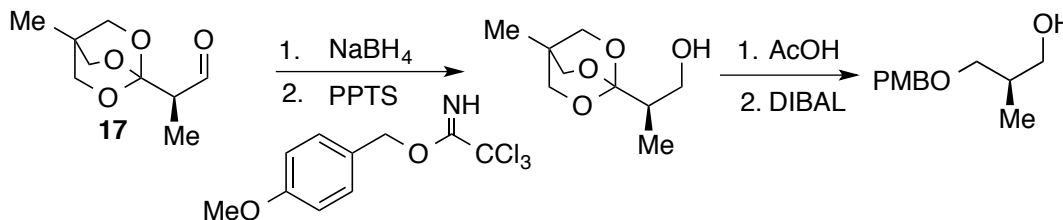

*racemic sample*

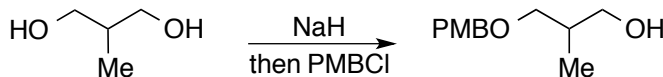

Chiral HPLC (Chiralpak, AD-H, 25 °C, 1 mL/min, 5% Isopropanol in hexane, 220 nm) – analysis of benzyl ether.

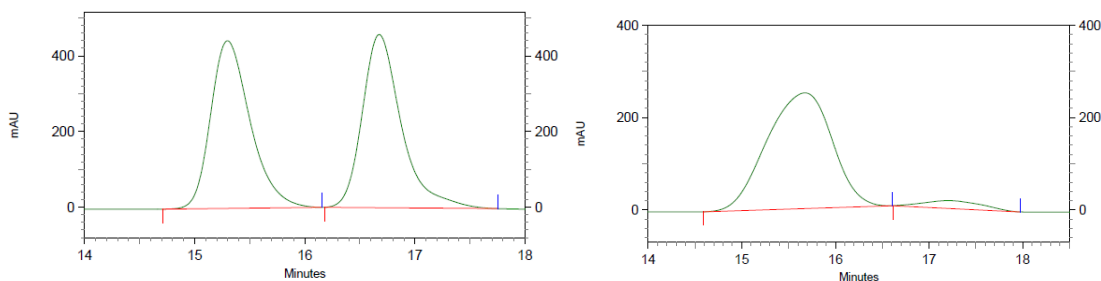

VWD: Signal A,  
220 nm Results

| Retention Time | Area      | Area % | Height  | Height % |
|----------------|-----------|--------|---------|----------|
| 15.673         | 203707854 | 94.27  | 4201524 | 93.65    |
| 17.203         | 12373743  | 5.73   | 284950  | 6.35     |

|        |           |        |         |        |
|--------|-----------|--------|---------|--------|
| Totals | 216081597 | 100.00 | 4486474 | 100.00 |
|--------|-----------|--------|---------|--------|

<sup>20</sup> Risi, R. M.; Burke, S. D. *Org. Lett.* **2012**, *14*, 2572.

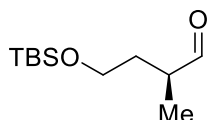

**(S)-4-((*tert*-Butyldimethylsilyloxy)-2-methylbutanal (19, Table 2).**

The titled compound was prepared via representative procedure **A** with olefin **18**. The crude reaction mixture was purified on silica gel (20:1 hexane: diethyl ether) to afford a clear, colorless oil (138 mg, 64% yield).  $[\alpha]_D^{22} = +18.347$  ( $c = 1.0$ ,  $\text{CHCl}_3$ ,  $l = 50$  mm). All spectral data are in accordance with literature.<sup>21</sup>

**Analysis of Stereochemistry:**

The titled compound was subjected to  $\text{NaBH}_4$  reduction followed by benzoate protection and TBS removal. The analogous racemic material was prepared by employing  $\text{PPh}_3$  as ligand in hydroformylation of olefin **18**. Optical purity was determined by chiral HPLC analysis of the derived alcohol. Absolute stereochemistry was determined by analogy the optical rotation reported in the literature.<sup>21</sup>

*optically pure sample*

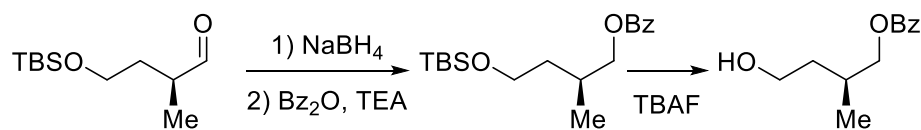

*racemic sample*

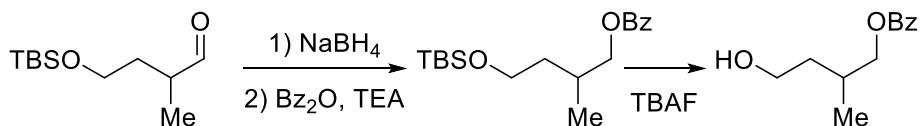

*Chiral HPLC (Chiralpak, AD-H, 25 °C, 1 mL/min, 3 % Isopropanol in hexane, 220 nm) – analysis of alcohol.*

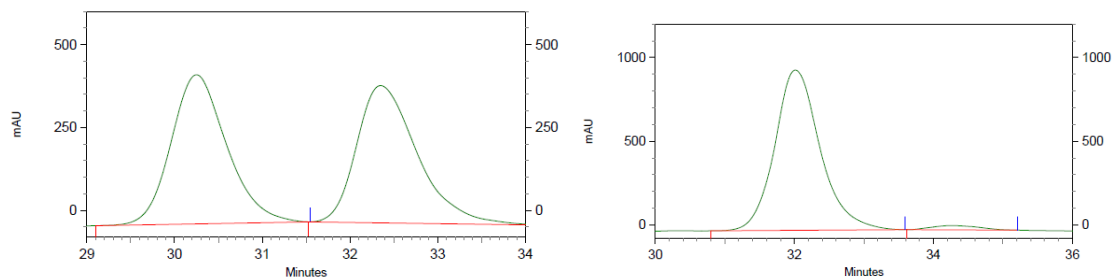

VWD: Signal A.  
220 nm Results

| Retention Time | Area      | Area % | Height   | Height % |
|----------------|-----------|--------|----------|----------|
| 32.013         | 730462339 | 97.33  | 16051857 | 97.44    |
| 34.263         | 20002090  | 2.67   | 422068   | 2.56     |
| Totals         | 750464429 | 100.00 | 16473925 | 100.00   |

<sup>21</sup> (a) Fürst, R.; Rinner, U. *J. Org. Chem.* **2013**, *78*, 8748. (b) Enders, D.; Vicario, J. L.; Job, A.; Wolberg, M.; Müller, M. *Chem. Eur. J.* **2002**, *8*, 4272.

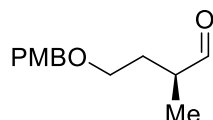

**(S)-4-((4-Methoxybenzyl)oxy)-2-methylbutanal (21, Table 2):** The titled compound was prepared *via* Representative Procedure A with olefin **20**. The crude reaction mixture was purified on silica gel (10:1 pentane: diethyl ether) to afford a clear, colorless oil (133 mg, 60% yield).  $R_f=0.17$  (5:1 pentane: diethyl ether, stain  $\text{KMnO}_4$ ).  $[\alpha]_D^{22} = +15.453$  ( $c = 0.522$ ,  $\text{CHCl}_3$ ,  $l = 50$  mm). All spectral data are in accordance with the literature.<sup>22</sup>

### Analysis of Stereochemistry:

The title compound was subjected to  $\text{NaBH}_4$  reduction followed by benzoate protection, as depicted below. The analogous racemic material was prepared *via* the same route, using triphenylphosphine as achiral ligand in the hydroformylation reaction. Optical purity was determined by SFC analysis of the derived compound as compared to racemic product. Absolute stereochemistry was determined by comparing to the optical rotation reported in the literature.<sup>23</sup>

*optically pure sample*

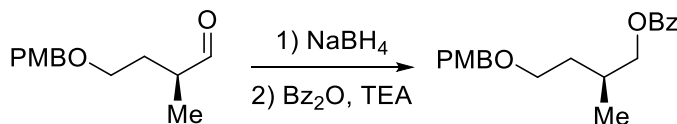

*racemic sample*

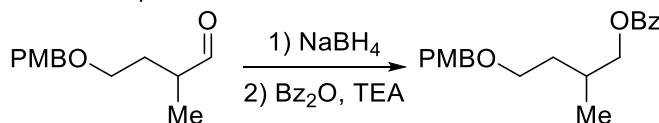

*Chiral SFC (OD-H, Chiralpak, 215nm, 3.0 mL/min, 10% i-PrOH, 100 bar, 35°C)-analysis of benzoate protected compound.*

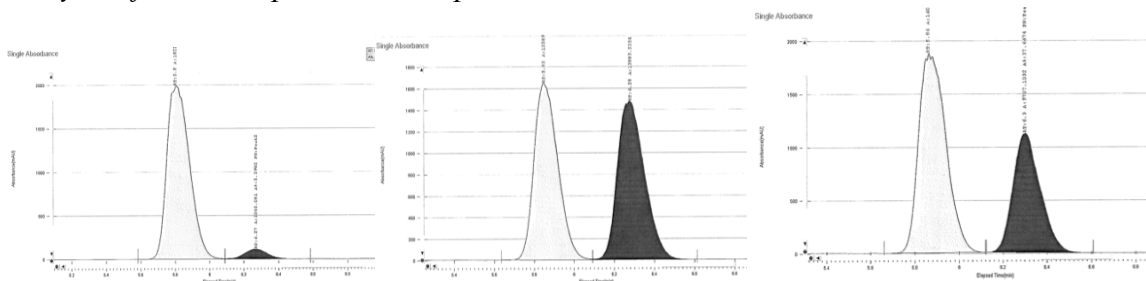

### Enantioenriched Sample

| Peak No | % Area  |
|---------|---------|
| 1       | 94.6018 |
| 2       | 5.3982  |
| Total:  | 100     |

### Racemic Sample

| Area       | RT (min) |
|------------|----------|
| 18227.1122 | 5.8      |
| 1040.081   | 6.27     |
| 19267.1932 |          |

### Co-injection

| Height (mV) | K'     |
|-------------|--------|
| 1988.7641   | 0.008  |
| 114.1512    | 0.0087 |

<sup>22</sup> Takagi, R.; Tsuyumine, S.; Nishitani, H.; Miyanaga, W.; Ohkata, K. *Aust. J. Chem.* **2004**, *57*, 439.

<sup>23</sup> Chen, J. L.-Y.; Brimble, M. A. *J. Org. Chem.* **2011**, *76*, 9417.



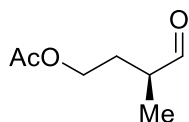

**(S)-4-Acetoxy-2-methyl butanal (23, Table 2):** The title compound was prepared with Representative Procedure A with olefin **22**. The crude reaction mixture was purified on silica gel (7:1 pentane: diethyl ether) to afford a clear, colorless oil (54 mg, 63% yield).  $R_f = 0.26$  (7:1 pentane: diethyl ether, stain in  $\text{KMnO}_4$ ).  $^1\text{H NMR}$  (500 MHz,  $\text{CDCl}_3$ ):  $\delta$  9.63 (1H, d,  $J = 1.5$  Hz), 4.14-4.11 (2H, m), 2.48 (1H, dd,  $J = 14.0$  Hz, 7.0 Hz), 2.11-2.04 (1H, m), 2.02 (3H, m), 1.73-1.66 (1H, m) 1.14 (3H, dd,  $J = 7.5$  Hz, 2.0 Hz);  $^{13}\text{C NMR}$  (125 MHz,  $\text{CDCl}_3$ ):  $\delta$  203.7, 170.9, 61.8, 43.5, 29.3, 20.8, 13.2; IR (neat): 2968 (w), 2932 (w), 1737 (s), 1459 (w), 1388 (w), 1367 (w), 1237 (s), 1052 (w)  $\text{cm}^{-1}$ ; HRMS-(ESI+) for  $\text{C}_7\text{H}_{12}\text{O}_3$   $[\text{M}+\text{NH}_4]^+$ : calculated: 162.1130, found 162.1134.  $[\alpha]_D^{22} = +2.245$  ( $c = 0.481$ ,  $\text{CHCl}_3$ ,  $l = 50$  mm).

### Analysis of Stereochemistry:

The title compound was subjected to  $\text{NaBH}_4$  reduction followed by benzoate protection, as depicted below. The analogous racemic material was prepared *via* the same route, using triphenylphosphine as achiral ligand in the hydroformylation reaction. Optical purity was determined by SFC analysis of the derived compound as compared to racemic product. Absolute stereochemistry was determined by analogy.

*optically pure sample*

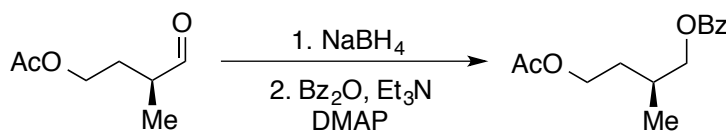

*racemic sample*

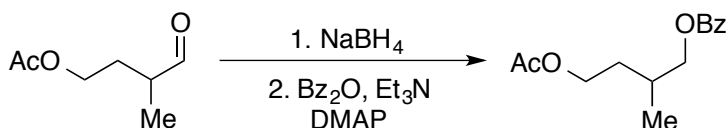

*Chiral SFC (OD-H, Chiralpak, 215nm, 3.0 mL/min, 1% i-PrOH, 100 bar, 35°C)-analysis of benzoate.*

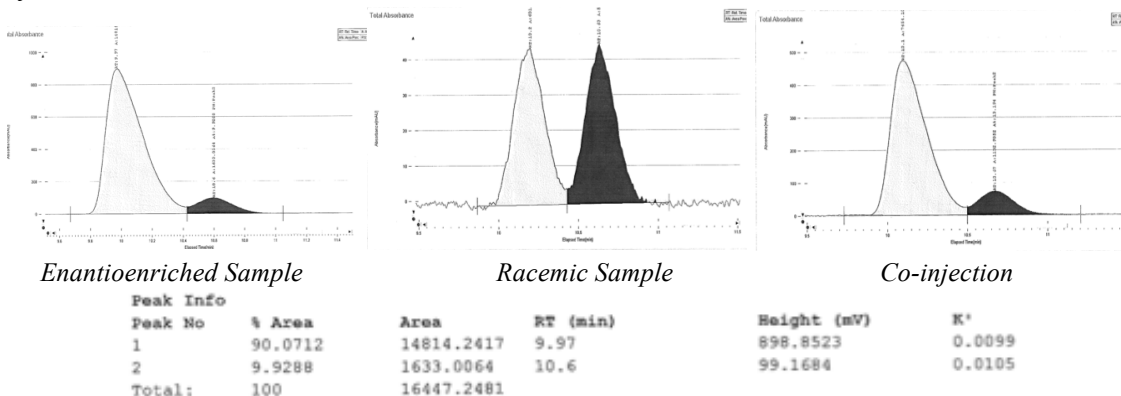

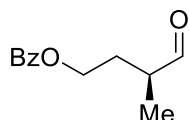

**(S)-3-Methyl-4-oxobutyl benzoate (25, Table 2):** The title compound was prepared with representative procedure A with olefin **24**. The crude reaction mixture was purified on silica gel (3:1 pentane: diethyl ether) to afford a clear, colorless oil (142 mg, 69% yield).  $R_f = 0.19$  (3:1 pentane: diethyl ether, stain in 2,4-DNP).  $^1\text{H NMR}$  (500 MHz,  $\text{CDCl}_3$ ):  $\delta$  9.71 (1H, d,  $J = 1.5$  Hz), 8.10-8.00 (2H, m), 7.56 (1H, tt,  $J = 7.5$  Hz, 1.5 Hz), 7.44 (2H, t,  $J = 8.0$  Hz), 4.44-4.37 (2H, m), 2.59 (1H, tt,  $J = 7.0$  Hz, 1.5 Hz), 2.25 (1H, dq,  $J = 14.5$  Hz, 6.5 Hz), 1.85 (1H, dq,  $J = 14.5$  Hz, 6.5 Hz), 1.21 (3H, d,  $J = 7.5$  Hz);  $^{13}\text{C NMR}$  (125 MHz,  $\text{CDCl}_3$ ):  $\delta$  203.8, 166.4, 133.0, 129.6, 128.4, 62.4, 29.5, 13.3; IR (neat): 2968 (m), 2931 (m), 1717 (s), 1452 (m), 1272 (s), 1070 (m), 936 (w), 711 (m)  $\text{cm}^{-1}$ ; HRMS-(ESI+) for  $\text{C}_{12}\text{H}_{15}\text{O}_3$  [M+H]: calculated: 207.1021, found 207.1015.  $[\alpha]_D^{22} = +38.947$  ( $c = 0.723$ ,  $\text{CHCl}_3$ ).

### Analysis of Stereochemistry:

The title compound was subjected to  $\text{NaBH}_4$  reduction followed by benzoate protection, as depicted below. The analogous racemic material was prepared *via* the same route, using triphenylphosphine as achiral ligand in the hydroformylation reaction. Optical purity was determined by SFC analysis of the derived compound as compared to racemic product. Absolute stereochemistry was determined by analogy.

*optically pure sample*

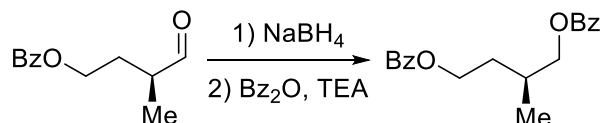

*racemic sample*

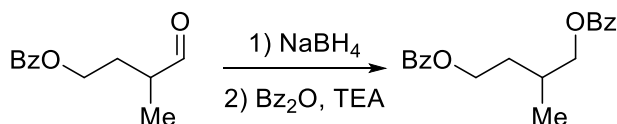

*Chiral SFC (OJ-H, Chiralpak, 215nm, 3.0 mL/min, 2% i-PrOH, 100 bar, 35°C)-analysis of bis-benzoate.*

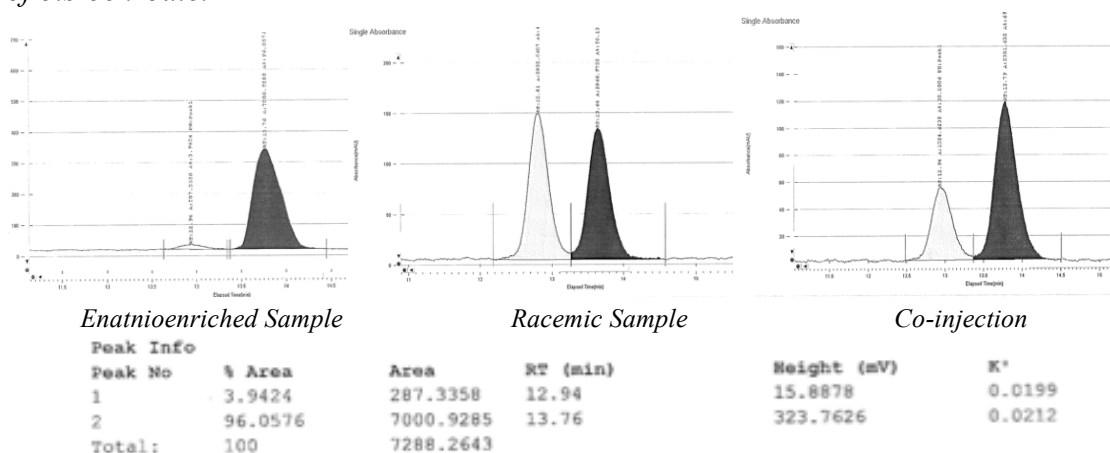

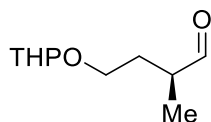

**(2S)-2-Methyl-4-((tetrahydro-2H-pyran-2-yl)oxy)butanal (27,**

**Table 2):** The title compound **27** was prepared using representative procedure **A** with olefin **26**. The crude reaction mixture was purified on silica gel (20:1 pentane: diethyl ether) to afford a colorless oil as a

1:1 mixture of inseparable diastereomers (114 mg, 35% yield).  $R_f = 0.17$  (10:1 pentane: diethyl ether, stain in 2,4-DNP).  $^1\text{H NMR}$  (500 MHz,  $\text{CDCl}_3$ ):  $\delta$  9.65 (1H, d,  $J = 1.5$  Hz), 9.64 (1H, d,  $J = 2.0$  Hz), 4.56-4.55 (2H, m), 3.52-3.48 (2H, m), 3.43 (2H, dddd,  $J = 22.0$  Hz, 12.5 Hz, 7.0 Hz, 6.0 Hz), 2.56-2.47 (2H, m), 2.03 (2H, ddt,  $J = 14.0$  Hz, 7.5 Hz, 5.5 Hz), 1.80-1.66 (6H, m), 1.58-1.49 (8H, m), 1.13 (3H, d,  $J = 1.5$  Hz), 1.12 (3H, d,  $J = 2.0$  Hz);  $^{13}\text{C NMR}$  (125 MHz,  $\text{CDCl}_3$ ):  $\delta$  204.7, 98.9, 98.8, 64.8, 64.5, 62.2, 44.0, 43.8, 31.0, 30.8, 30.5, 25.4, 19.4, 13.3, 13.1; IR (neat): 2939 (m), 2872 (m), 2714 (w), 1723 (s), 1120 (m), 1022 (m), 973 (s), 732 (m),  $\text{cm}^{-1}$ ; HRMS-(ESI+) for  $\text{C}_{10}\text{H}_{19}\text{O}_3$  [M+H] $^+$ : calculated: 187.1334, found 187.1344.  $[\alpha]_D^{22} = +26.258$  ( $c = 0.646$ ,  $\text{CHCl}_3$ ,  $l = 50$  mm).

**Analysis of Stereochemistry:**

The title compound was subjected to  $\text{NaBH}_4$  reduction, followed by removal of the tetrahydropyranyl ether group and bis-benzoyl protection, as depicted below. The analogous racemic material was prepared *via* the same route, using tricyclohexylphosphine as achiral ligand in the hydroformylation reaction. Optical purity was determined by SFC analysis of the derived compound. Absolute stereochemistry was determined by analogy.

*optically pure sample*

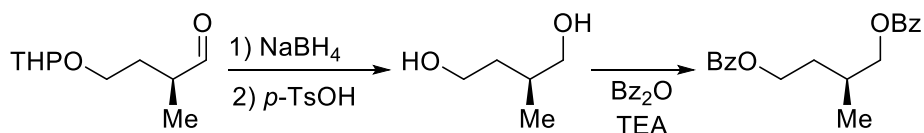

*racemic sample*

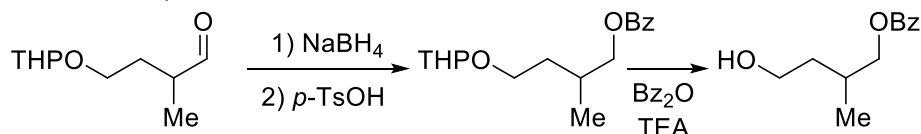

*Chiral SFC (OJ-H, Chiralpak, 215nm, 3.0 mL/min, 2% i-PrOH, 100 bar, 35°C)-analysis of benzoate protected compound.*

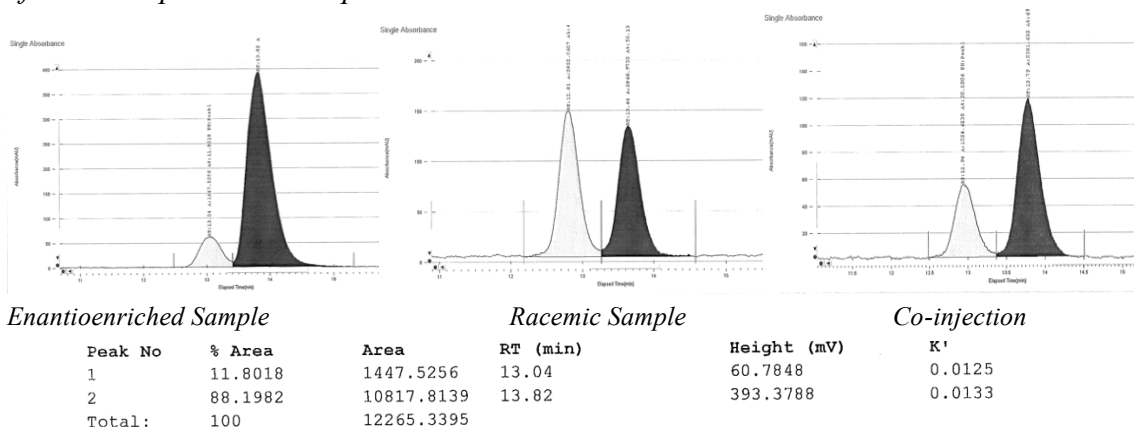

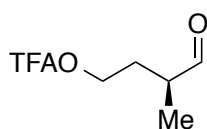

**(S)-3-methyl-4-oxobutyl 2,2,2-trifluoroacetate (29, Table 2):** The title compound was prepared using representative procedure **A** with olefin **28**. The crude reaction was purified on silica gel (7:1 pentane: diethyl ether) to afford a yellow oil (124 mg, 63% yield).  $R_f = 0.25$  (7:1 pentane: diethyl ether, stain in 2,4-DNP).  $^1\text{H NMR}$  (500 MHz,  $\text{CDCl}_3$ ):  $\delta$  9.67 (1H, s), 4.43 (2H, t,  $J = 6.0$  Hz), 2.50 (1H, dd,  $J = 15.0$  Hz, 7.5 Hz), 2.20 (1H, dd,  $J = 13.5$  Hz, 6.5 Hz), 1.79 (1H, dd,  $J = 12.5$  Hz, 6.0 Hz), 1.21 (3H, d,  $J = 7.5$  Hz).  $^{19}\text{F}$  (470 Hz,  $\text{CDCl}_3$ ):  $\delta$  -75.0; IR (neat): 2975 (w), 1768 (m), 1711 (m), 1219 (m), 1158 (s), 816 (w).  $[\alpha]_D^{22} = +16.553$  ( $c = 0.252$ ,  $\text{CHCl}_3$ ,  $l = 50$  mm).

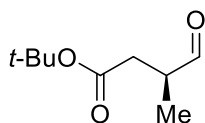

**tert-Butyl-(S)-3-methyl-4-oxobutyl (31, Table 2):** The title compound was prepared using representative procedure **A** with olefin **30**. The crude reaction mixture was purified on silica gel (10:1 pentane: diethyl ether) to afford a clear, colorless oil (93 mg, 54% yield).  $R_f = 0.12$  (10:1 pentane: diethyl ether, stain in  $\text{KMnO}_4$ ).  $^1\text{H NMR}$  (500 MHz,  $\text{CDCl}_3$ ):  $\delta$  9.69 (1H, d,  $J = 1.0$  Hz), 2.78 (1H, dq,  $J = 14.0$  Hz, 7.0 Hz), 2.64 (1H, dd,  $J = 16.0$  Hz, 7.0 Hz), 2.34 (1H, dd,  $J = 16.5$  Hz, 6.5 Hz), 1.44 (9H, s);  $^{13}\text{C NMR}$  (125 MHz,  $\text{CDCl}_3$ ):  $\delta$  202.9, 170.9, 81.0, 42.8, 36.4, 28.0, 13.2; IR (neat): 2978 (w), 2933 (w), 2717 (w), 1727 (s), 1367 (w), 1156 (w)  $\text{cm}^{-1}$ ; HRMS-(ESI+) for  $\text{C}_9\text{H}_{16}\text{O}_3$   $[\text{M}+\text{H}]$ : calculated: 173.1178, found 173.1184.  $[\alpha]_D^{22} = -98.065$  ( $c = 0.153$ ,  $\text{CHCl}_3$ ,  $l = 50$  mm).

### Analysis of Stereochemistry:

The title compound **25** was subjected to  $\text{NaBH}_4$  reduction followed by benzoate protection, as depicted below. The analogous racemic material was prepared *via* the same route, using triphenylphosphine as achiral ligand in the hydroformylation reaction. Optical purity was determined by SFC analysis of the derived compound as compared to racemic product. Absolute stereochemistry was determined by analogy.

*optically pure sample*

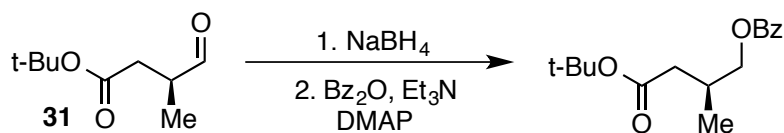

*racemic sample*

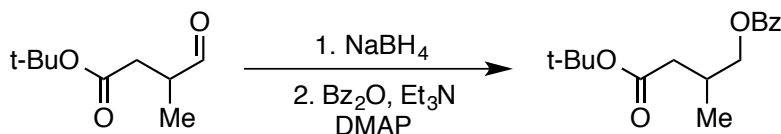

Chiral SFC (OD-H, Chiralpak, 215nm, 3.0 mL/min, 1% i-PrOH, 100 bar, 35°C)-analysis of benzoate protected compound.

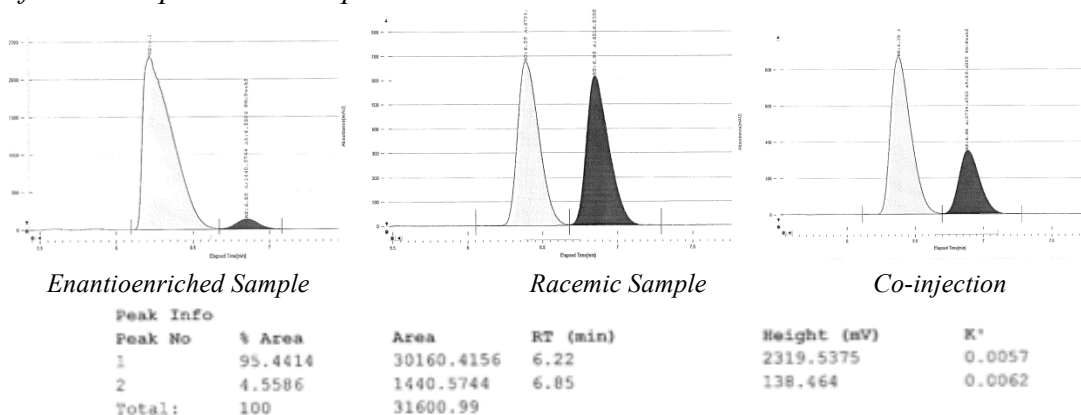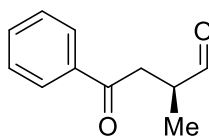

**(S)-2-Methyl-4-oxo-4-phenylbutanal (33, Table 2).** The title compound was prepared using representative procedure A with olefin **32**. The crude reaction mixture was purified on silica gel (6:1 pentane: diethyl ether) to afford a clear, colorless oil (116 mg, 66% yield).  $R_f = 0.17$  (5:1 pentane: diethyl ether, stain in  $\text{KMnO}_4$ ). All spectral data are in accordance with the literature.<sup>24</sup>

<sup>24</sup> Zhang, J.; Xing, C.; Tiwari, B.; Chi, Y. *J. Am. Chem. Soc.* **2013**, *135*, 8113.

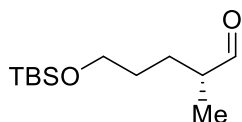

**(S)-5-((*tert*-Butyldimethylsilyloxy)-2-methylpentanal (compound 35, Table 2):** The titled compound **35** was prepared with representative procedure **A** (using (*R,R*)-Ph-BPE ligand) with olefin **34**. The crude reaction mixture was purified on silica gel (10:1 pentane: diethyl ether) to afford a clear, colorless oil (97 mg, 42 % yield).  $R_f = 0.26$  (10:1 pentane: diethyl ether, stain in  $\text{KMnO}_4$ ).  $[\alpha]_D^{22} = -46.830$  ( $c = 0.556$ ,  $l = 50$  mm,  $\text{CHCl}_3$ ). All spectral data were in accordance with the literature.<sup>25</sup>

### Analysis of Stereochemistry:

The titled compound **35** was subjected to  $\text{NaBH}_4$  reduction followed by benzoate protection, as depicted below. The analogous racemic material was prepared *via* the same route, using triphenylphosphine as achiral ligand in the hydroformylation reaction. Optical purity was determined by SFC analysis of the derived compound as compared to racemic product. Absolute stereochemistry was determined by comparison with literature.<sup>25</sup>

*optically pure sample*

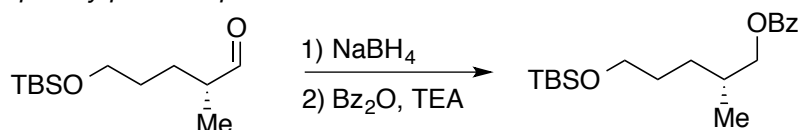

*racemic sample*

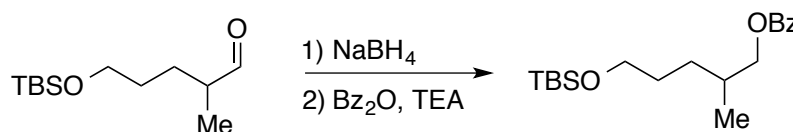

*Chiral SFC (OD-H, Chiralpak, 215nm, 3.0 mL/min, 3% i-PrOH, 100 bar, 35°C)-analysis of benzoate.*

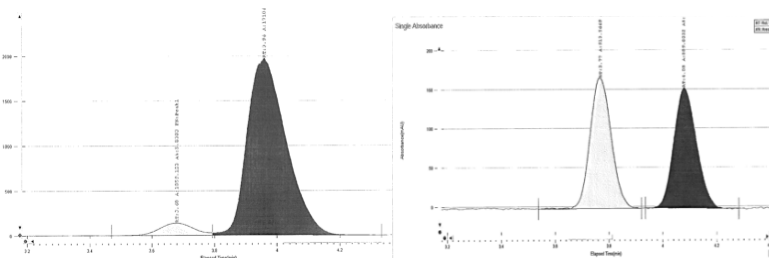

| Peak Info |         |            |          | Peak Info   |        |
|-----------|---------|------------|----------|-------------|--------|
| Peak No   | % Area  | Area       | RT (min) | Height (mV) | K'     |
| 1         | 5.8303  | 1059.123   | 3.68     | 138.5669    | 0.0067 |
| 2         | 94.1697 | 17106.7375 | 3.96     | 1972.3598   | 0.0072 |
| Total:    | 100     | 18165.8605 |          |             |        |

<sup>25</sup> Rentsch, A.; Kalesse, M. *Angew. Chem. Int. Ed.* **2012**, *51*, 11381.

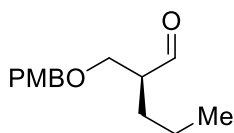

**(S)-2-(((4-Methoxybenzyl)oxy)methyl)pentanal (37, Scheme 4).**

The title compound was prepared using representative procedure A with olefin **36**. The crude reaction mixture was purified on silica gel (12:1 hexane: diethyl ether) to afford a clear, colorless oil (132 mg, 56% yield).  $R_f = 0.35$  (6:1 hexane:diethyl ether, stain in  $\text{KMnO}_4$ ).  $^1\text{H NMR}$  (500 MHz,  $\text{CDCl}_3$ ):  $\delta$  9.68 (1H, d,  $J = 2.5$  Hz), 7.23 (2H, d,  $J = 9.0$  Hz), 6.88 (2H, d,  $J = 8.5$  Hz), 4.43 (2H, m), 3.80 (3H, s), 3.66 (1H, dd,  $J = 9.0$  Hz, 7.0 Hz), 3.61 (1H, dd,  $J = 9.5$  Hz, 5.0 Hz), 2.55 (1H, m), 1.65 (1H, ddt,  $J = 14.5$  Hz, 7.5 Hz, 7.5 Hz), 1.45 (1H, ddt,  $J = 14.5$  Hz, 7.0 Hz, 7.0 Hz), 1.33 (2H, 2H, qt,  $J = 7.0$  Hz, 7.0 Hz), 0.91 (3H, t,  $J = 7.0$  Hz);  $^{13}\text{C NMR}$  (125 MHz,  $\text{CDCl}_3$ ):  $\delta$  204.4, 159.5, 130.2, 129.4, 114.0, 73.1, 68.5, 55.5, 52.2, 28.2, 20.4, 14.3; IR (neat): 2958 (w), 2933 (w), 2864 (w), 1725 (s), 1612 (m), 1513 (s), 1465 (w), 1247 (s), 1086 (s), 1034 (s), 819 (s)  $\text{cm}^{-1}$ ; HRMS-(ESI+) for  $\text{C}_{14}\text{H}_{19}\text{O}_3$   $[\text{M}+\text{H}]^+$ : calculated: 235.1334, found: 235.1343.  $[\alpha]_D^{22} = -17.033$  ( $c = 0.95$ ,  $\text{CHCl}_3$ ).

**Analysis of Stereochemistry:**

The titled compound **37** was converted to the corresponding alcohol as shown below. The resulting alcohol was compared to racemic material prepared from 2-propylpropan-1,3-diol. Absolute stereochemistry was assigned by comparing optical rotation of the alcohol to literature [lit.  $[\alpha]_D^{22} = -14.0$  ( $c = 1.1$ ,  $\text{CHCl}_3$ )].<sup>26</sup>

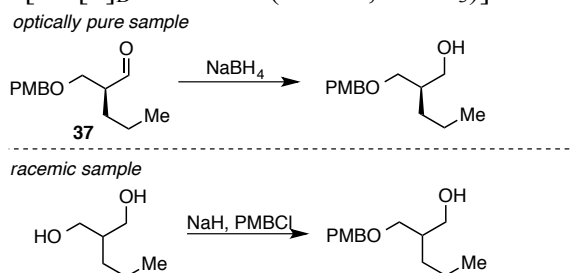

Chiral SFC (AS-H, Chiralpak, 215nm, 3.0 mL/min, 15% *i*-PrOH, 100 bar, 35°C)-analysis of alcohol.

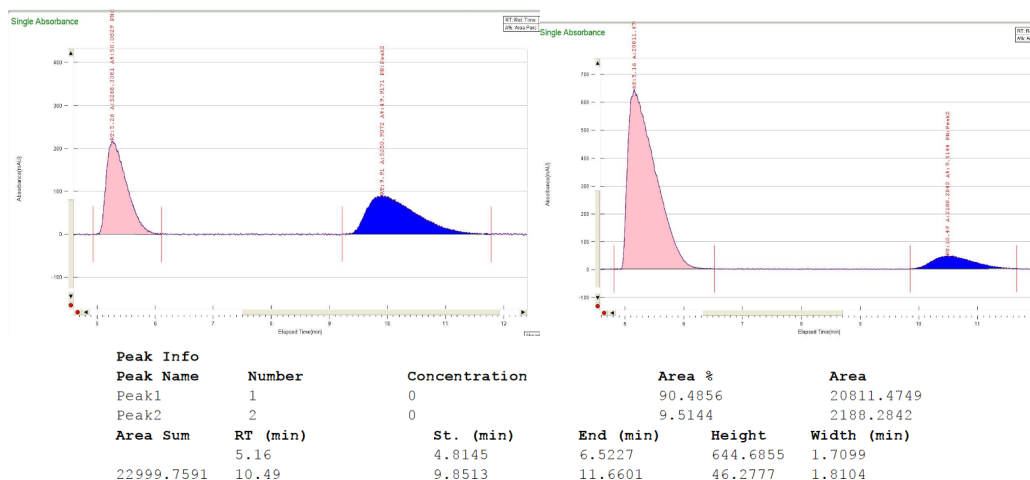

<sup>26</sup> Yadav, J. S.; Nanda, S. *Tetrahedron: Asymmetry*, **2001**, *12*, 3223.

# Spectral Data

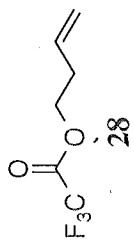

2.52  
2.51  
2.51  
2.50  
2.50  
2.49  
2.48

5.80  
5.78  
5.76  
5.76  
5.74  
5.73  
5.19  
5.18  
5.18  
5.16  
5.16  
5.15  
5.15  
5.15  
5.14  
5.14  
5.13  
5.13  
4.42  
4.40  
4.39

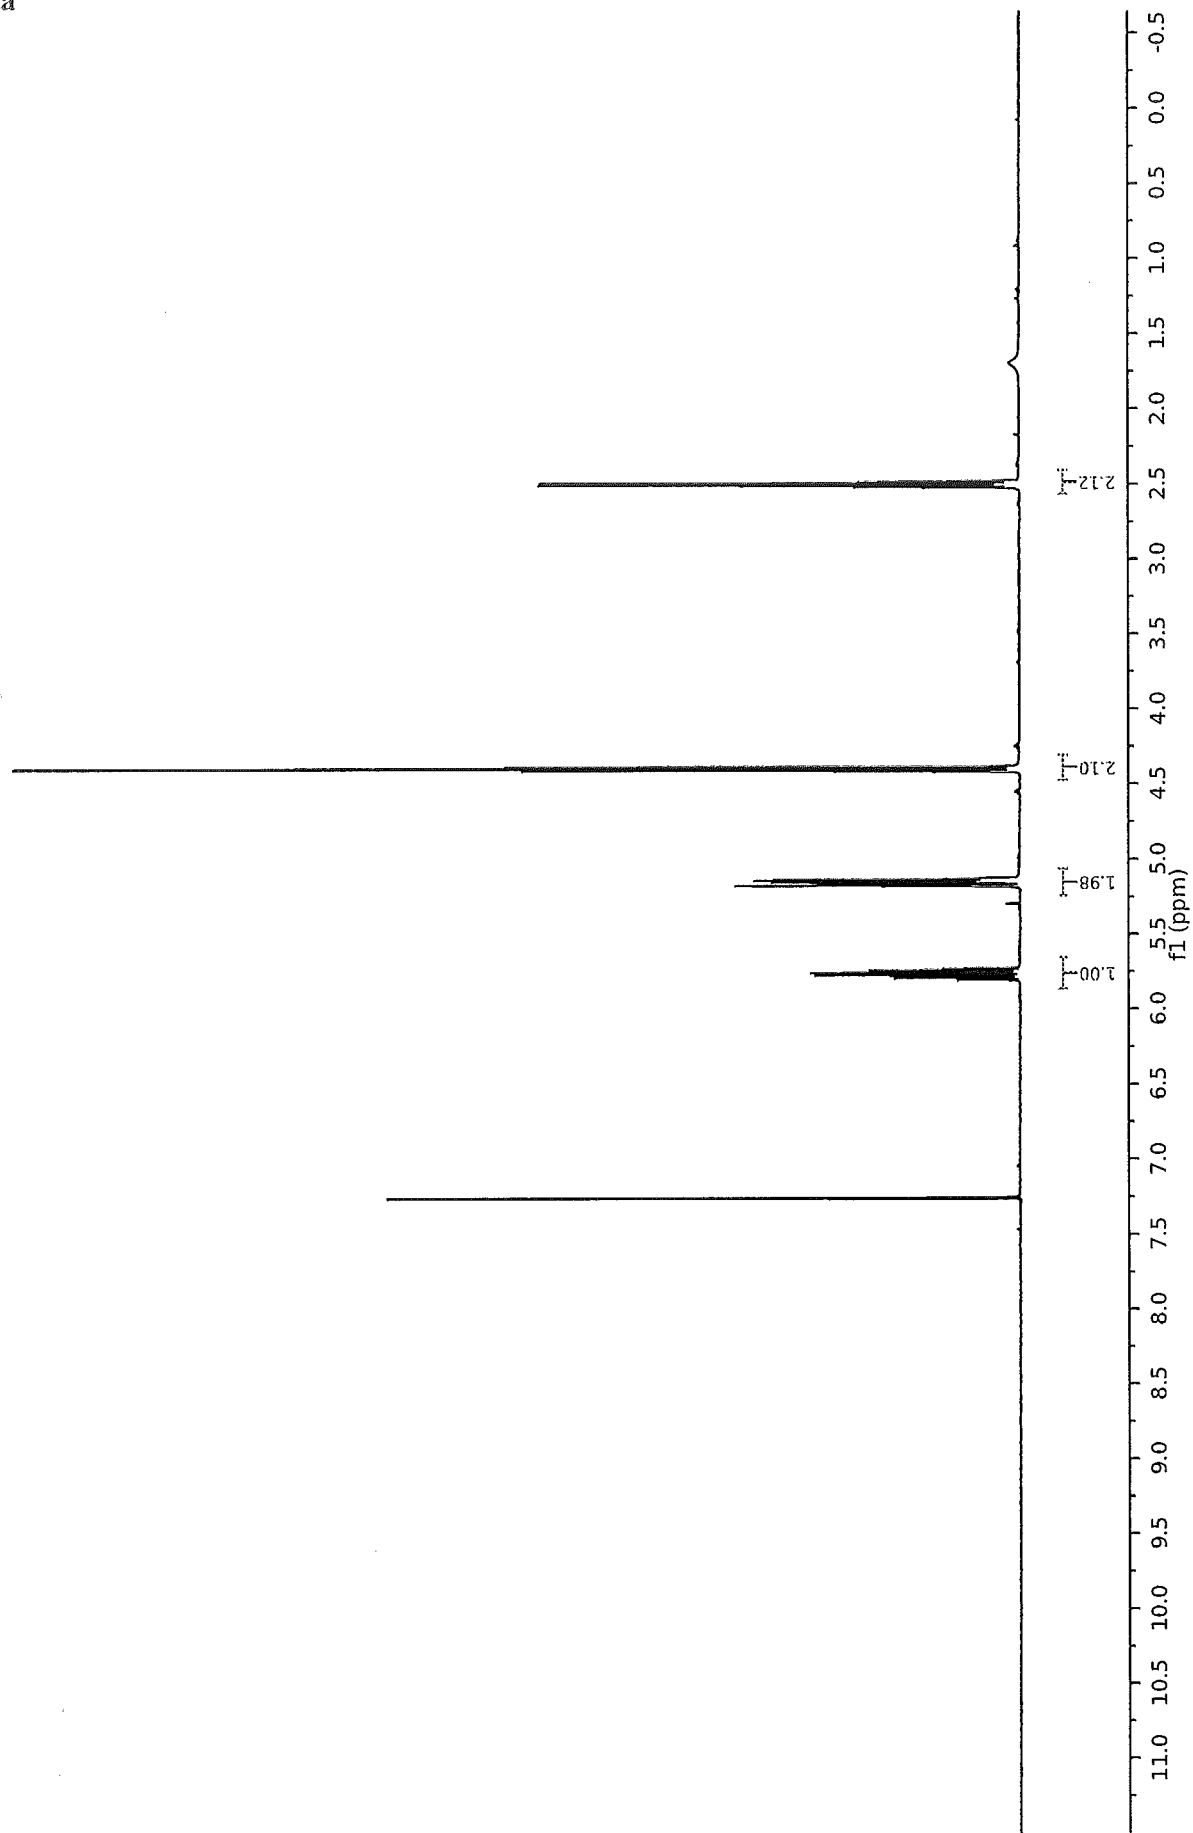



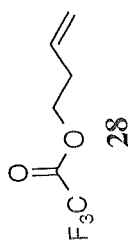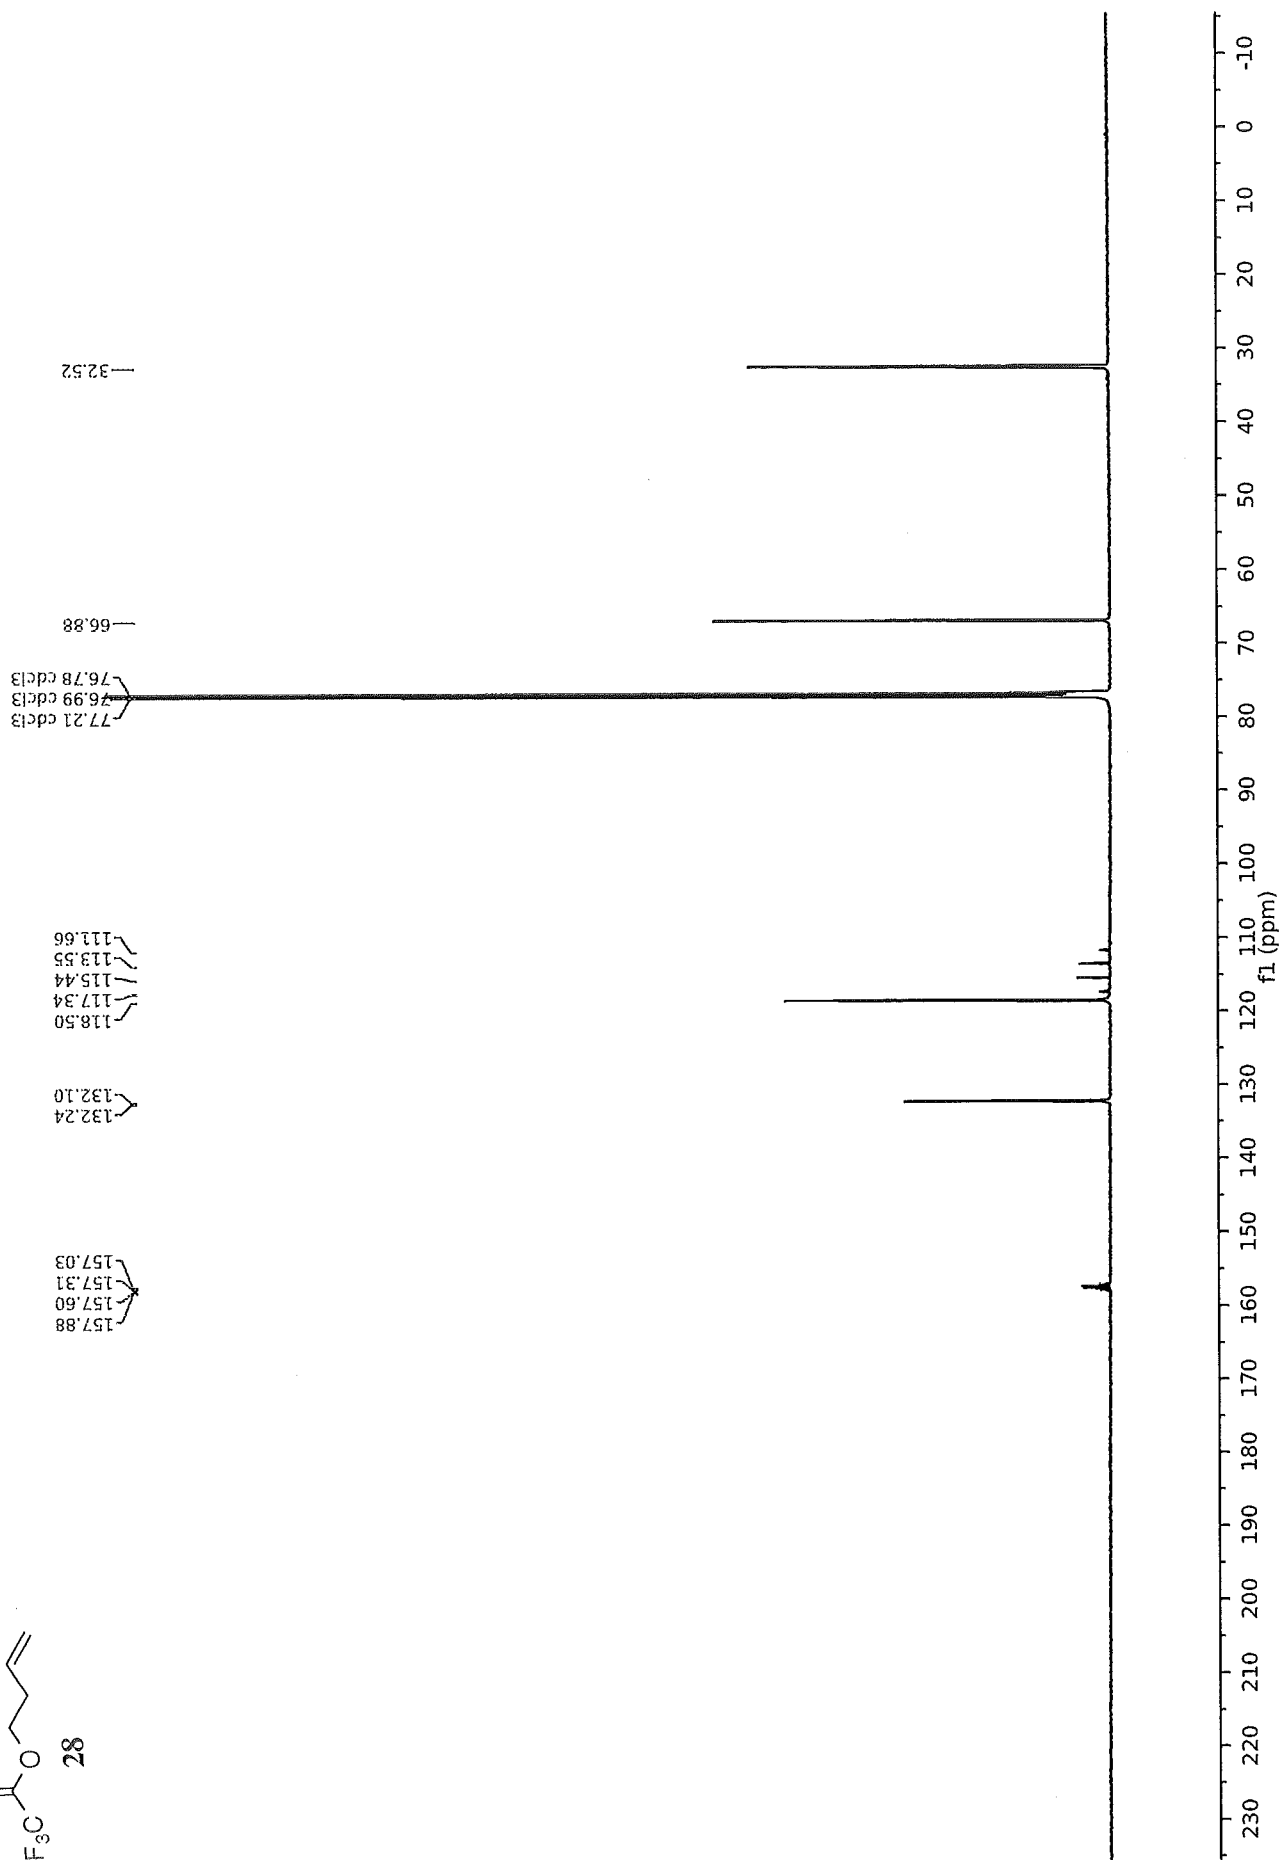

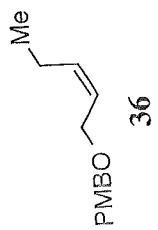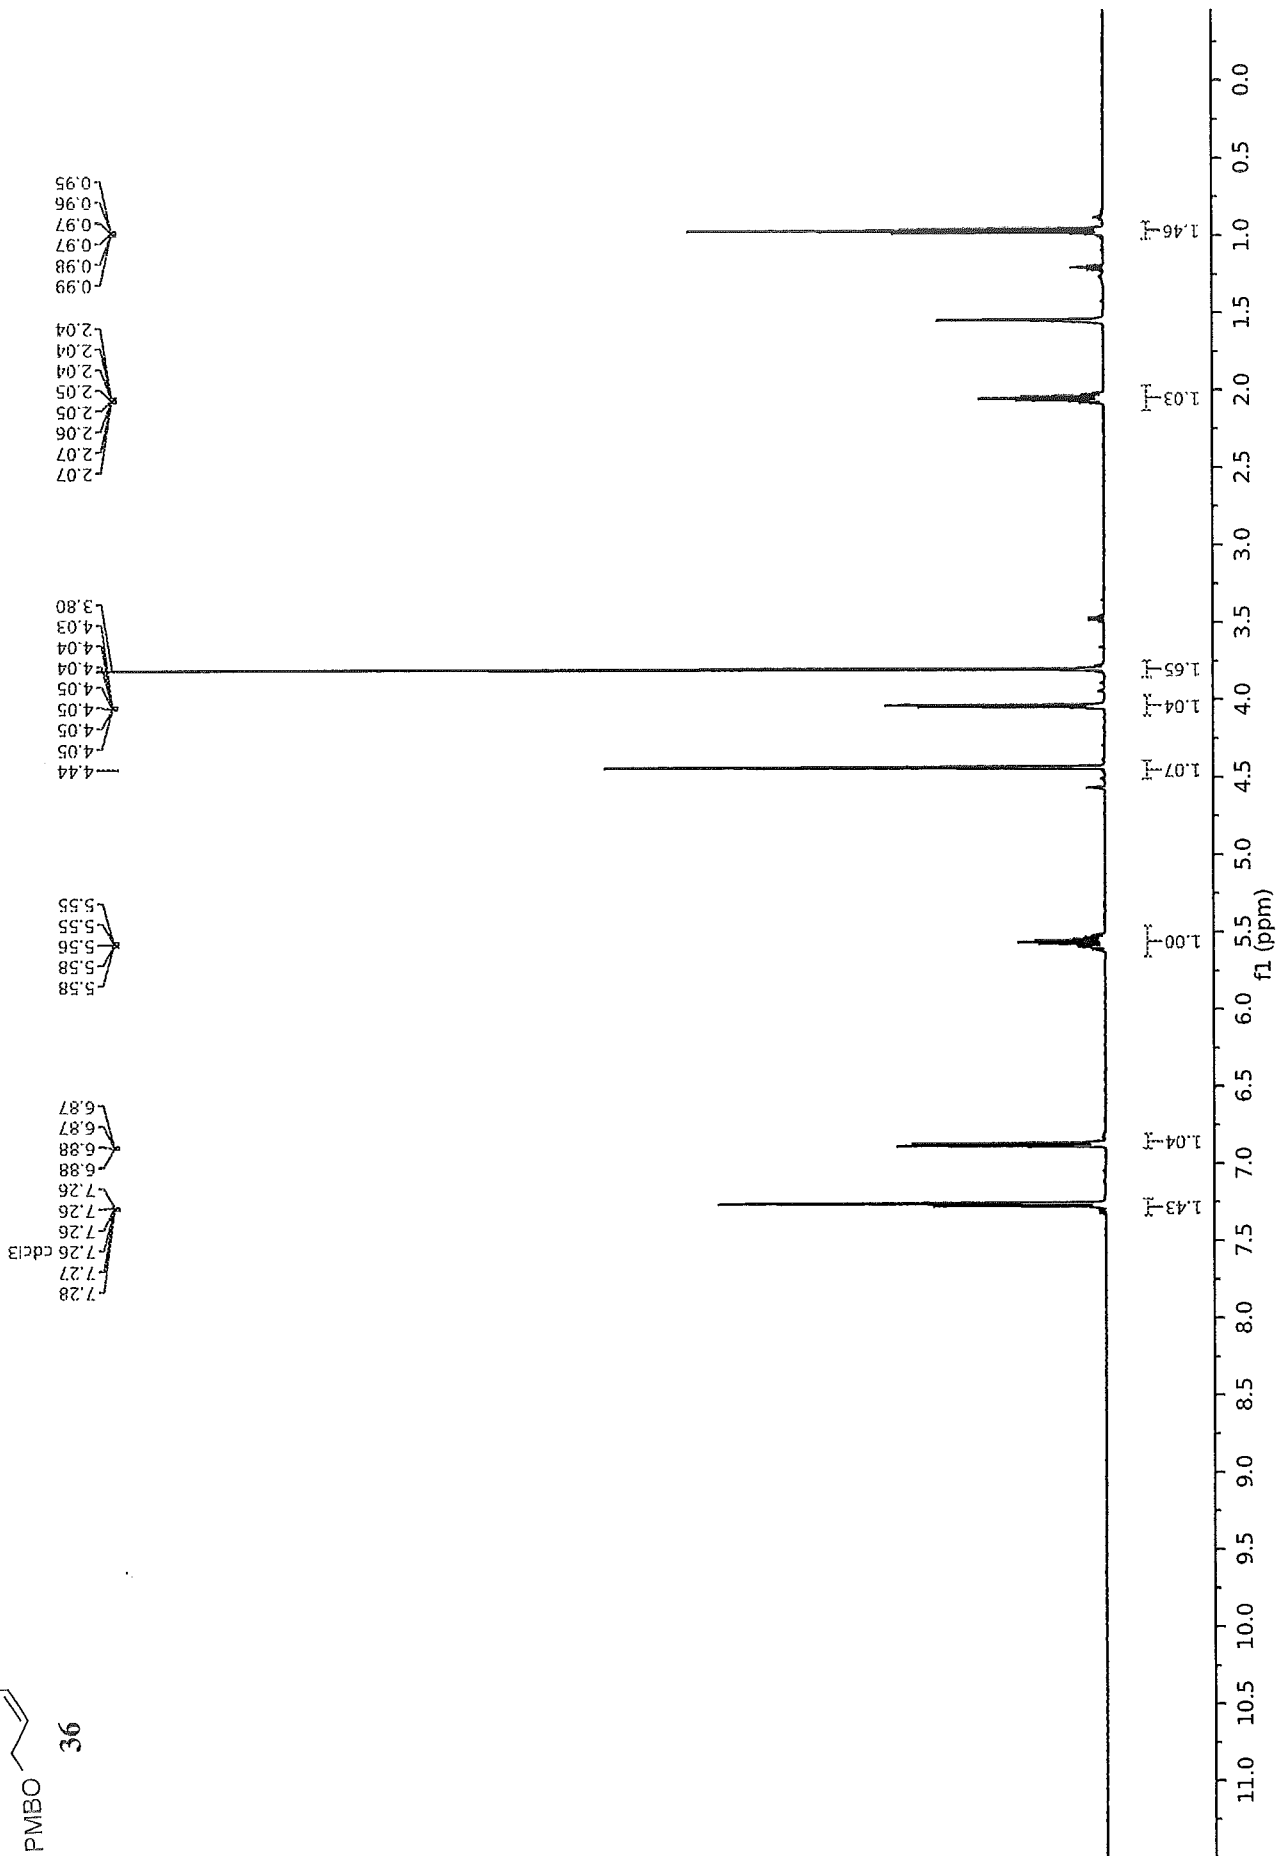

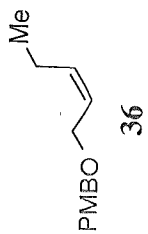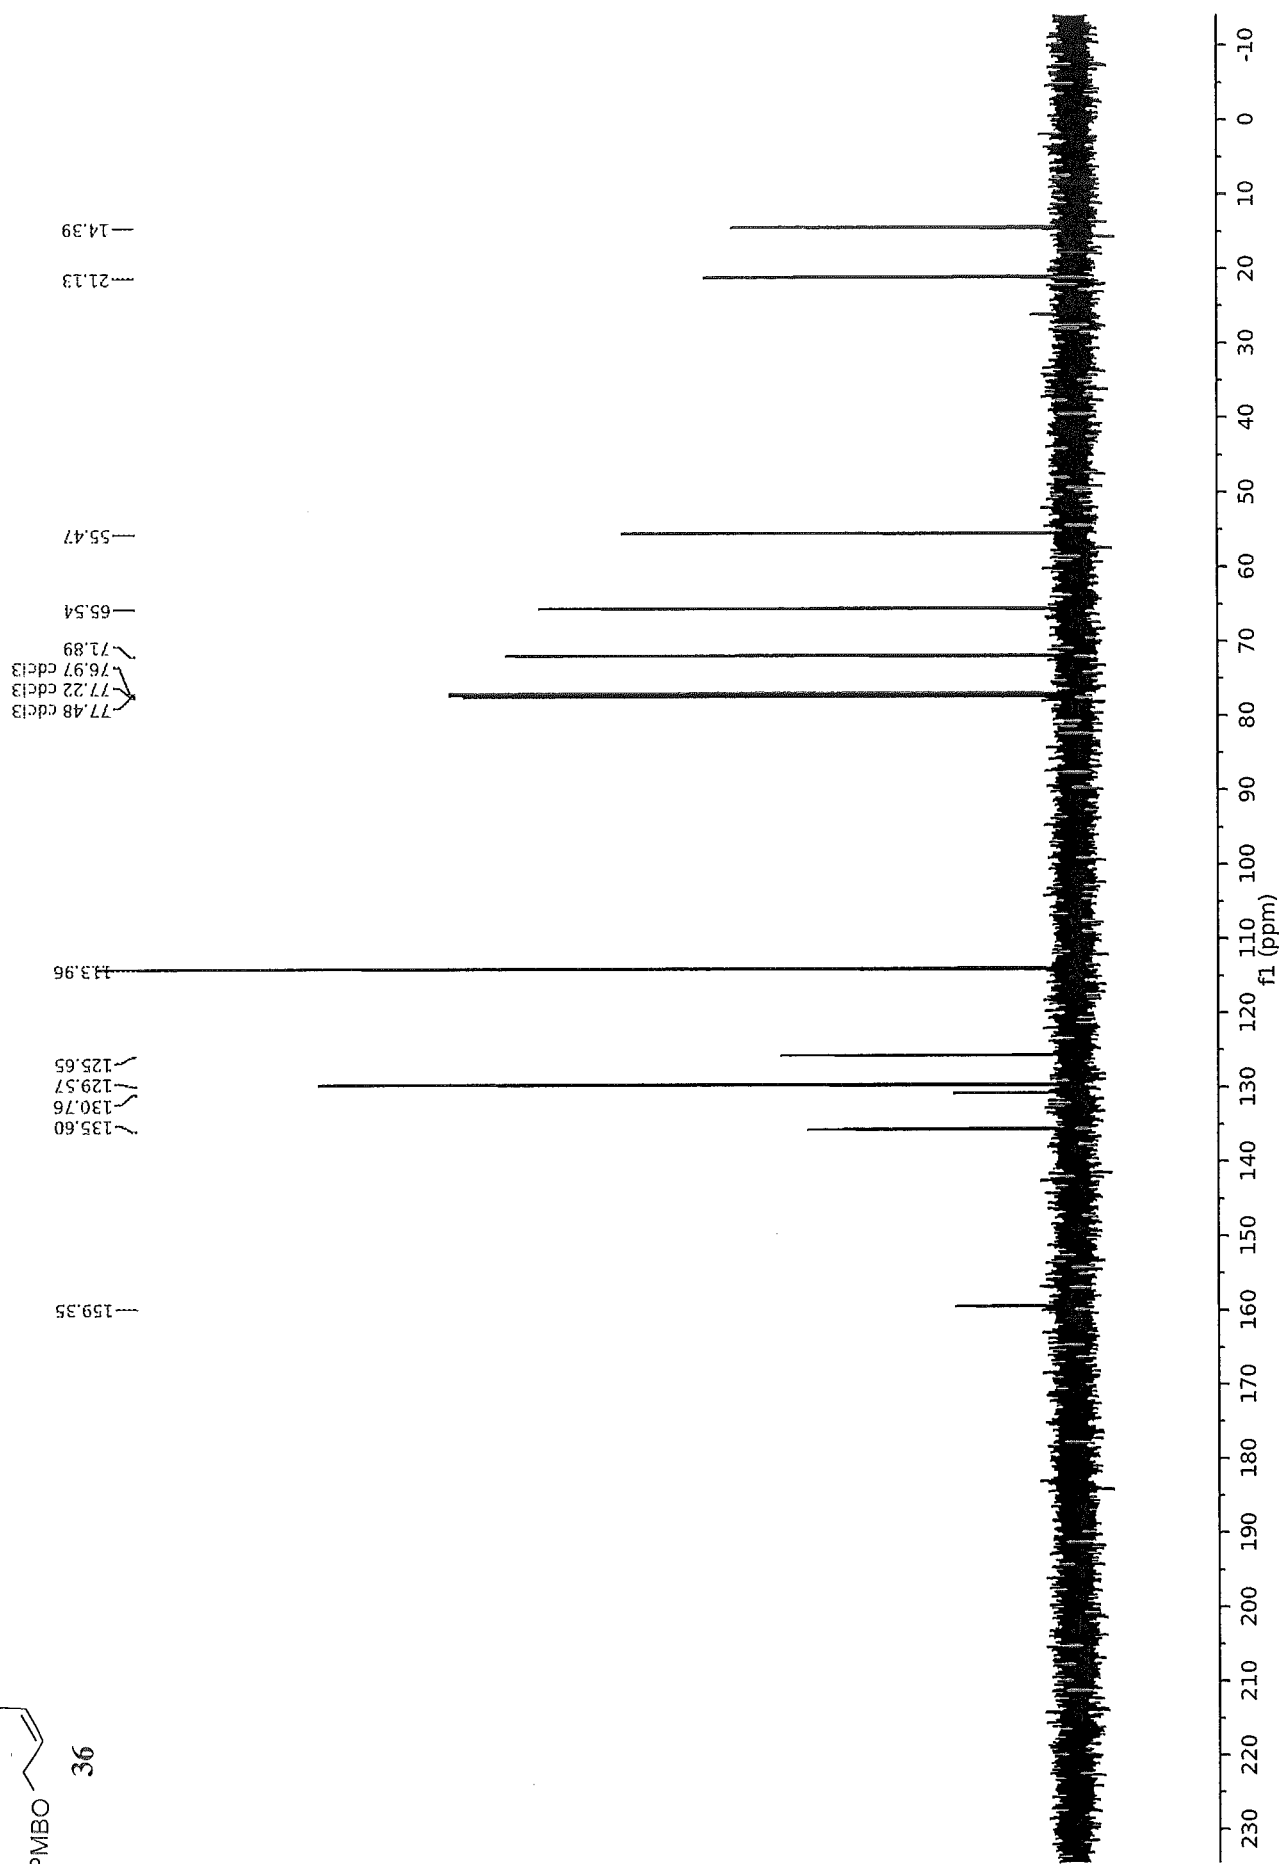

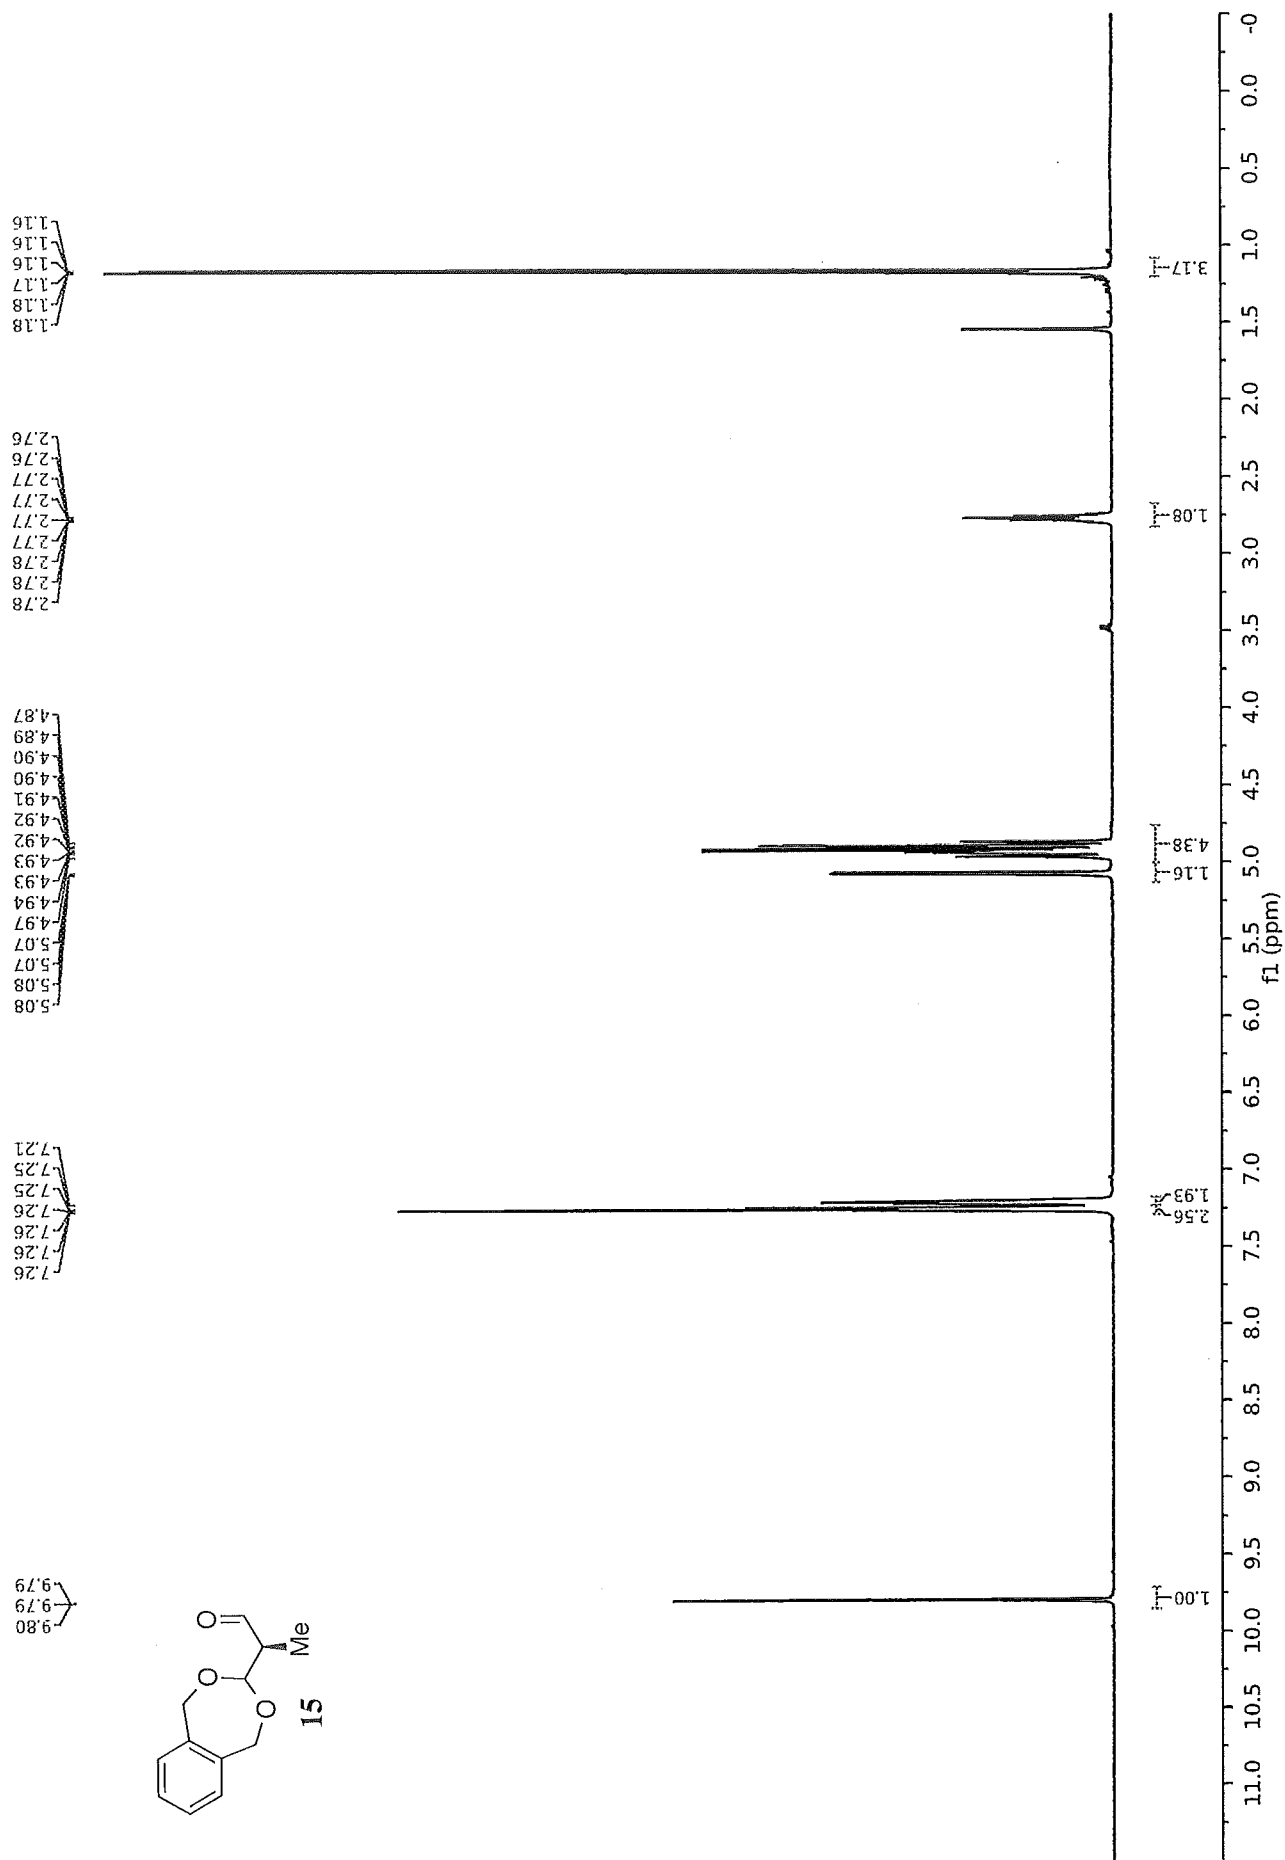

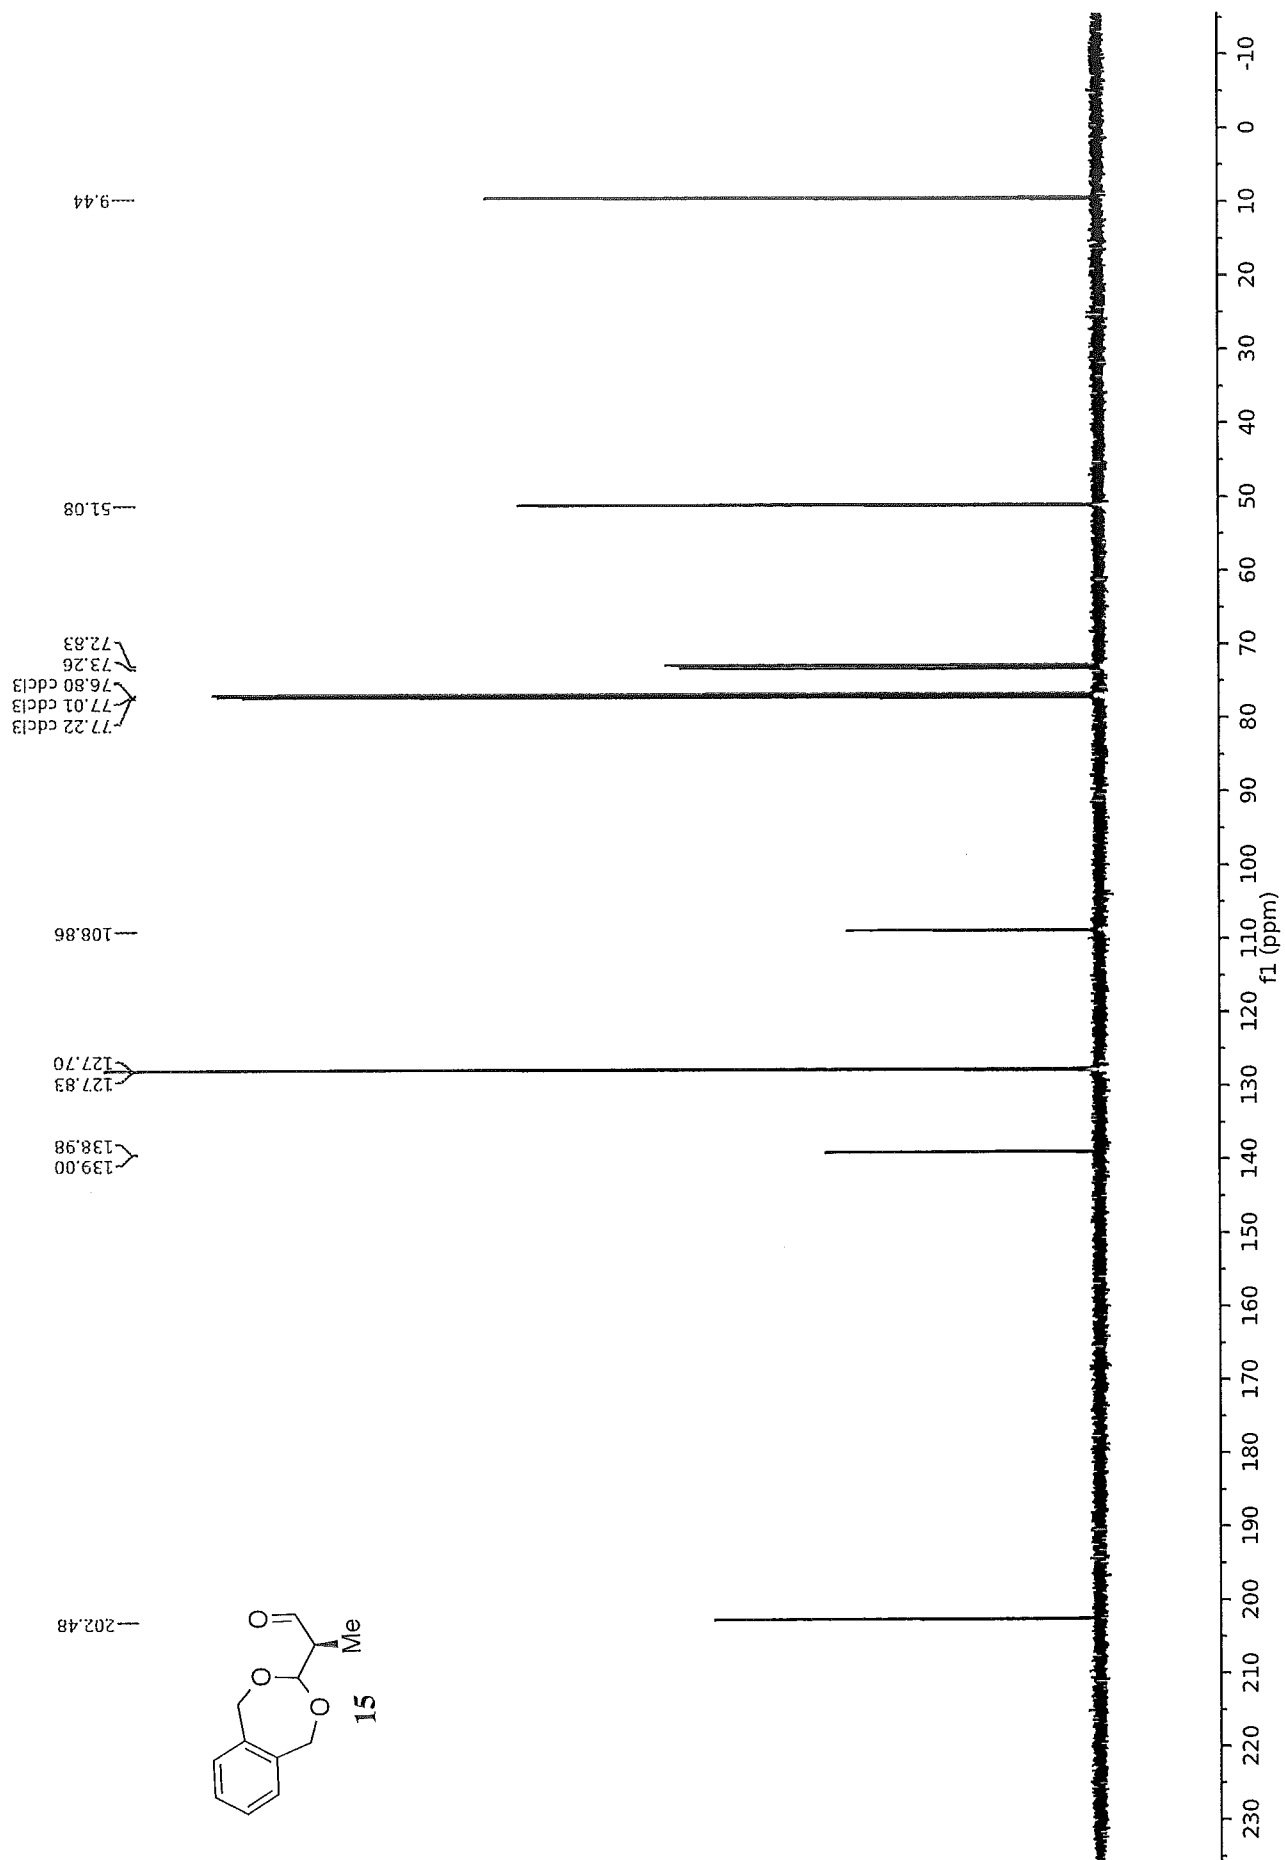

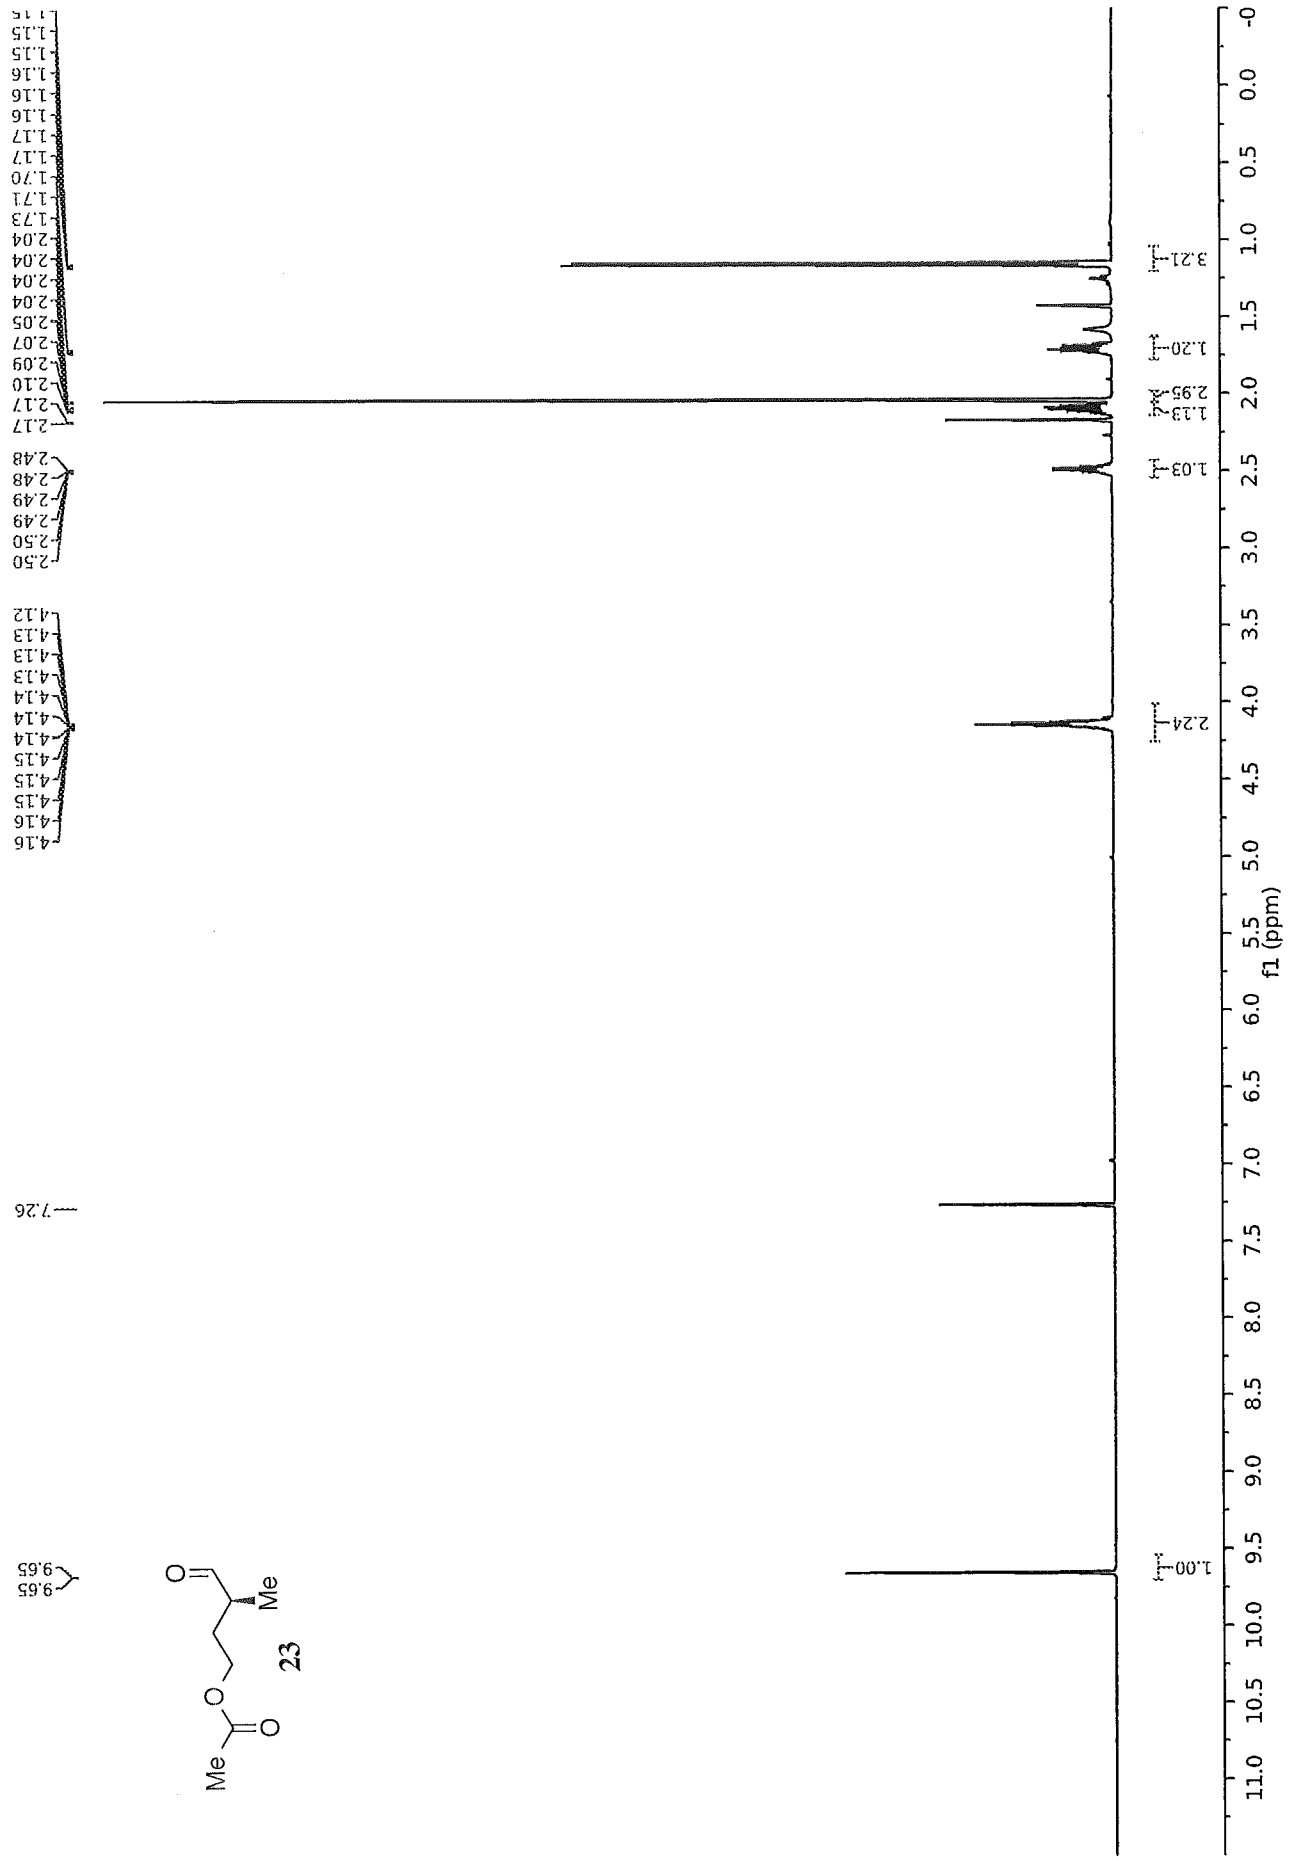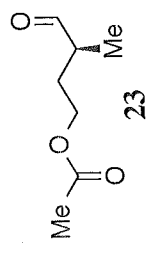

9.65

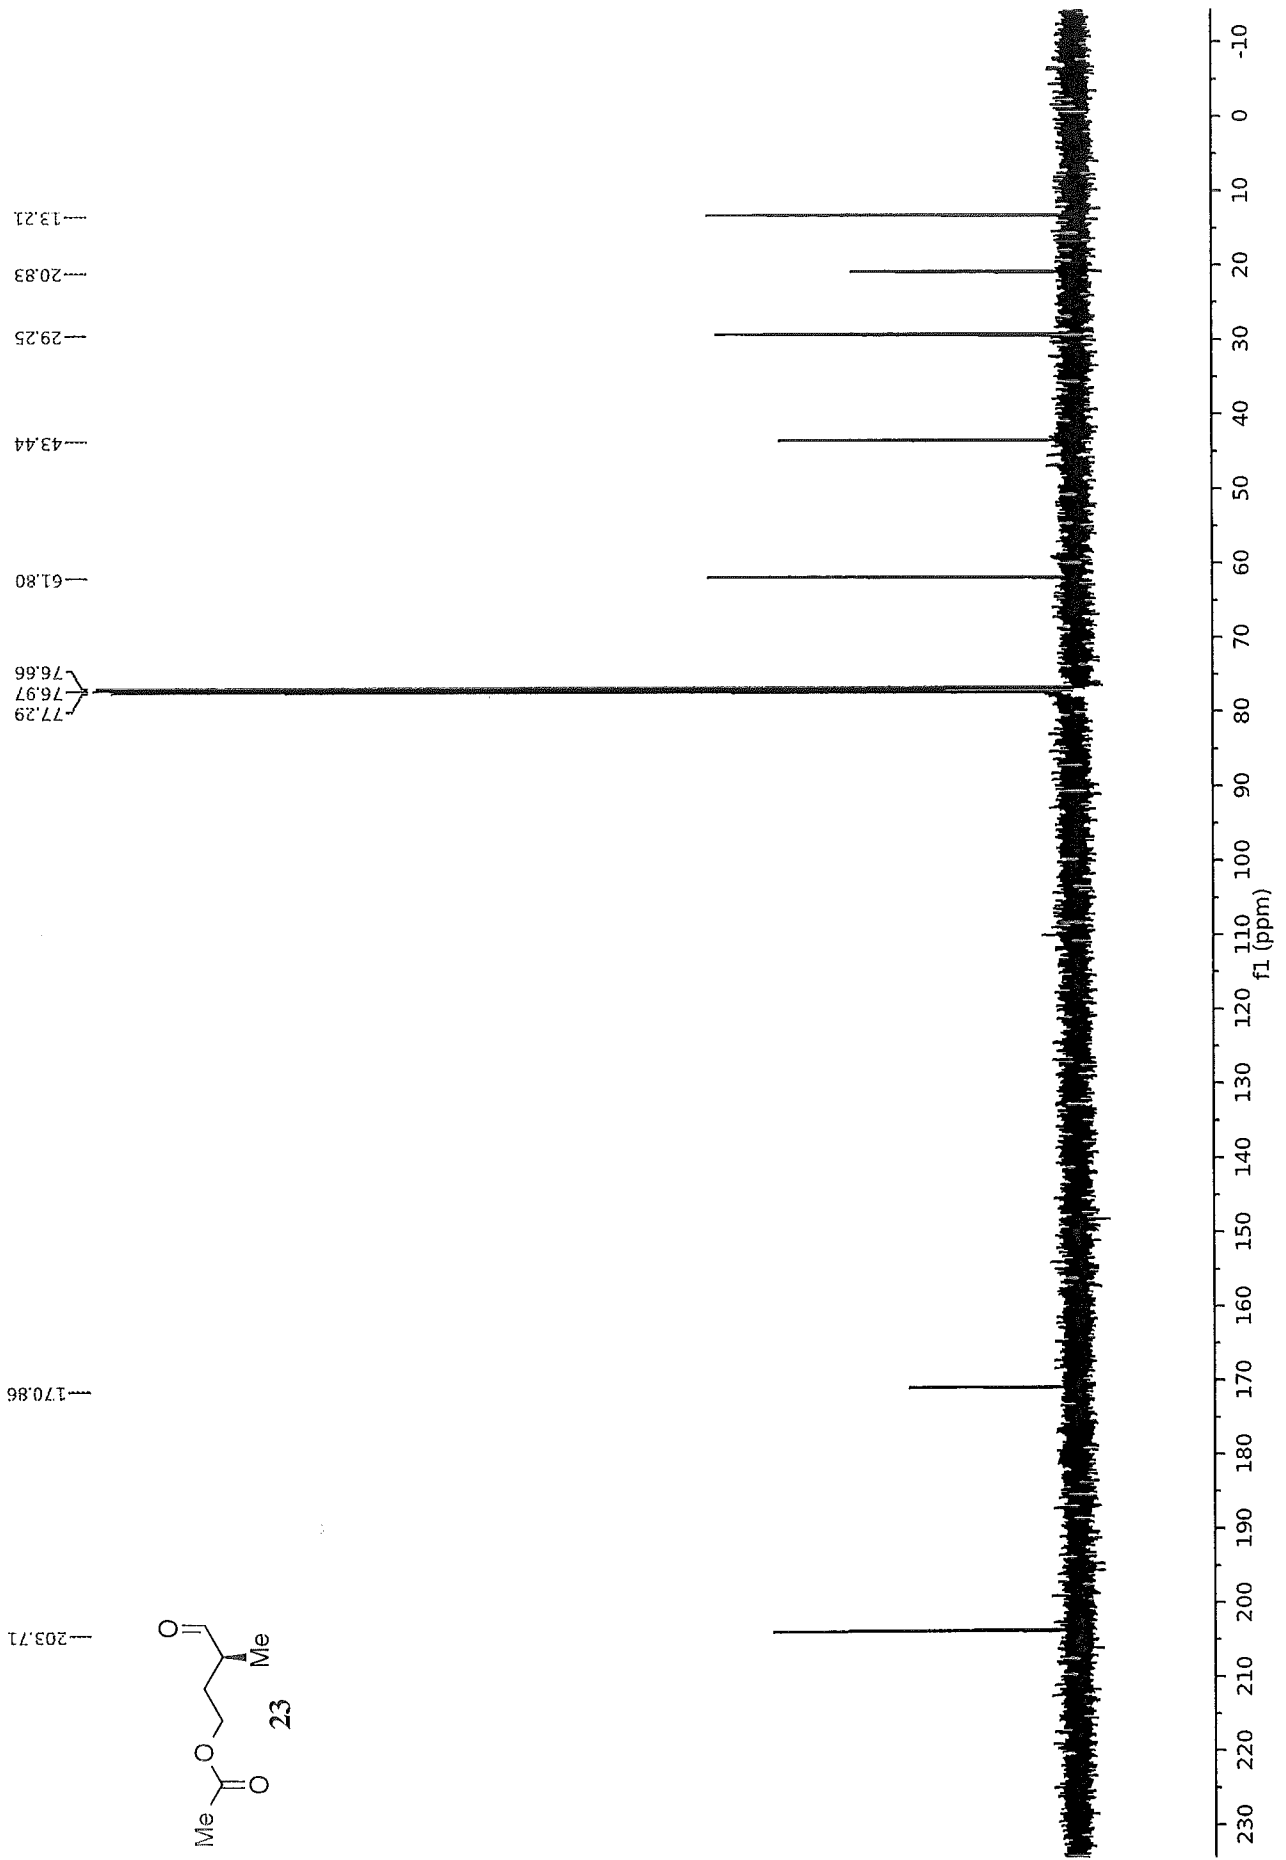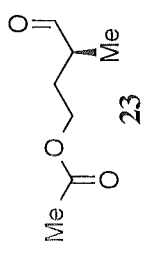

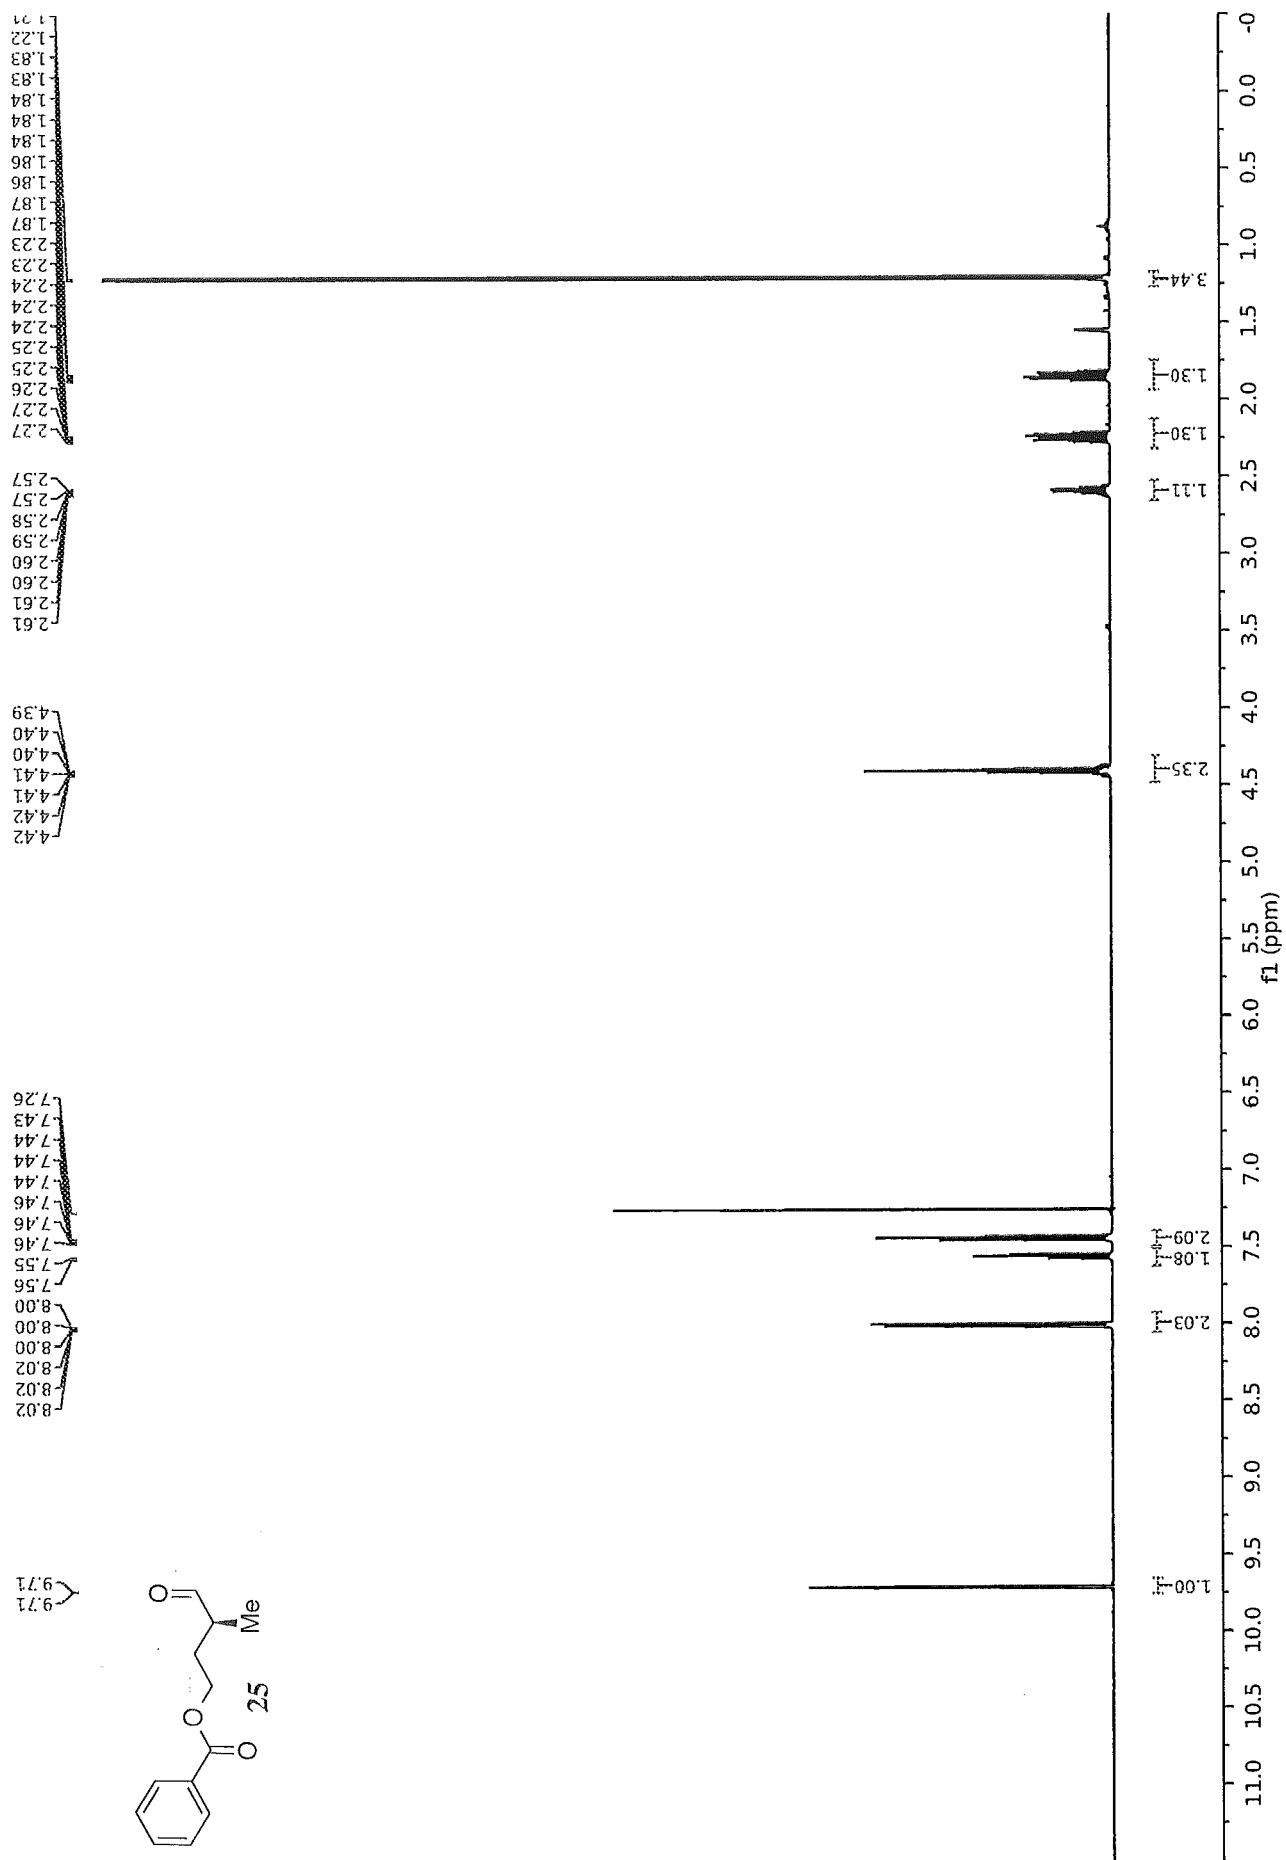



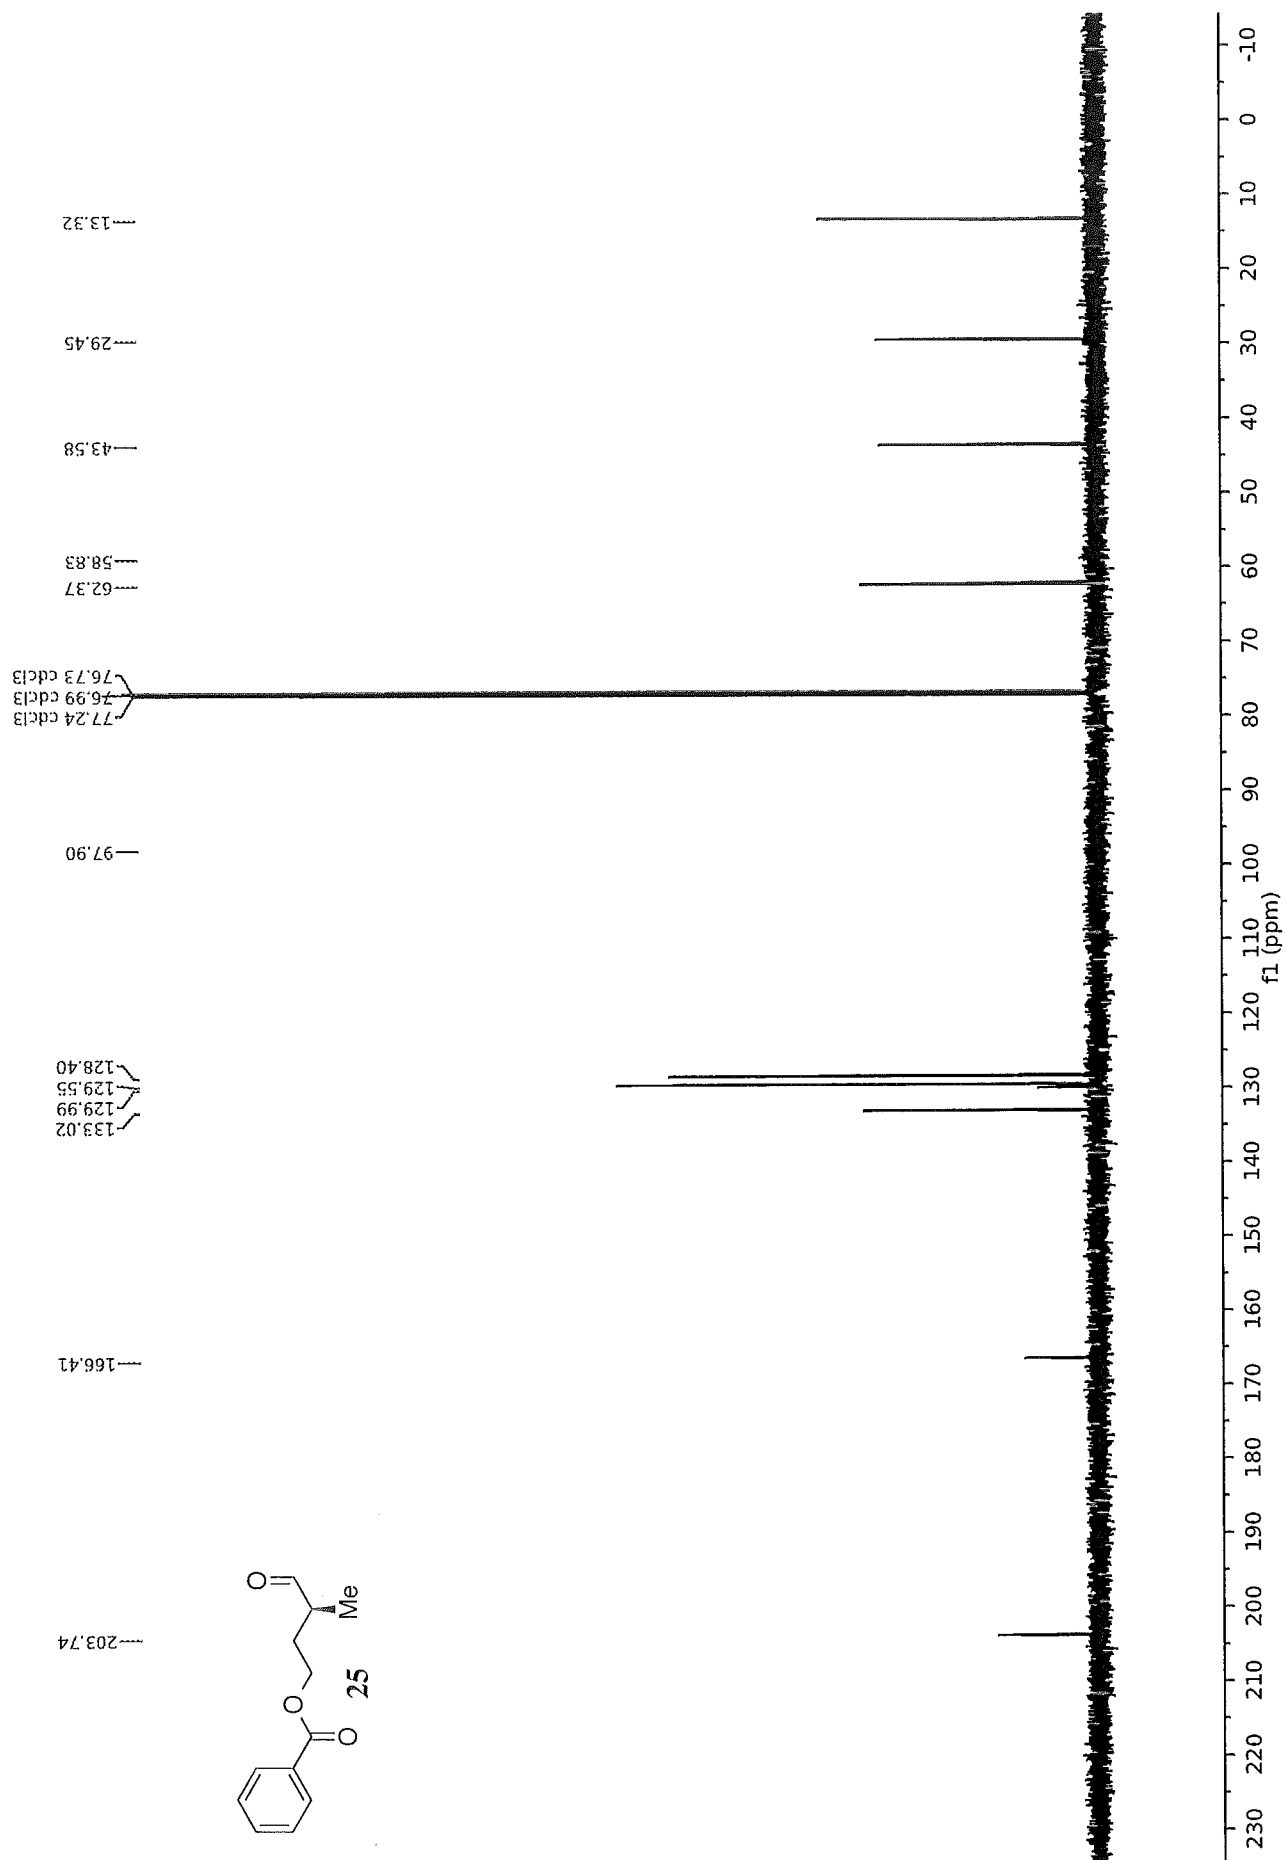



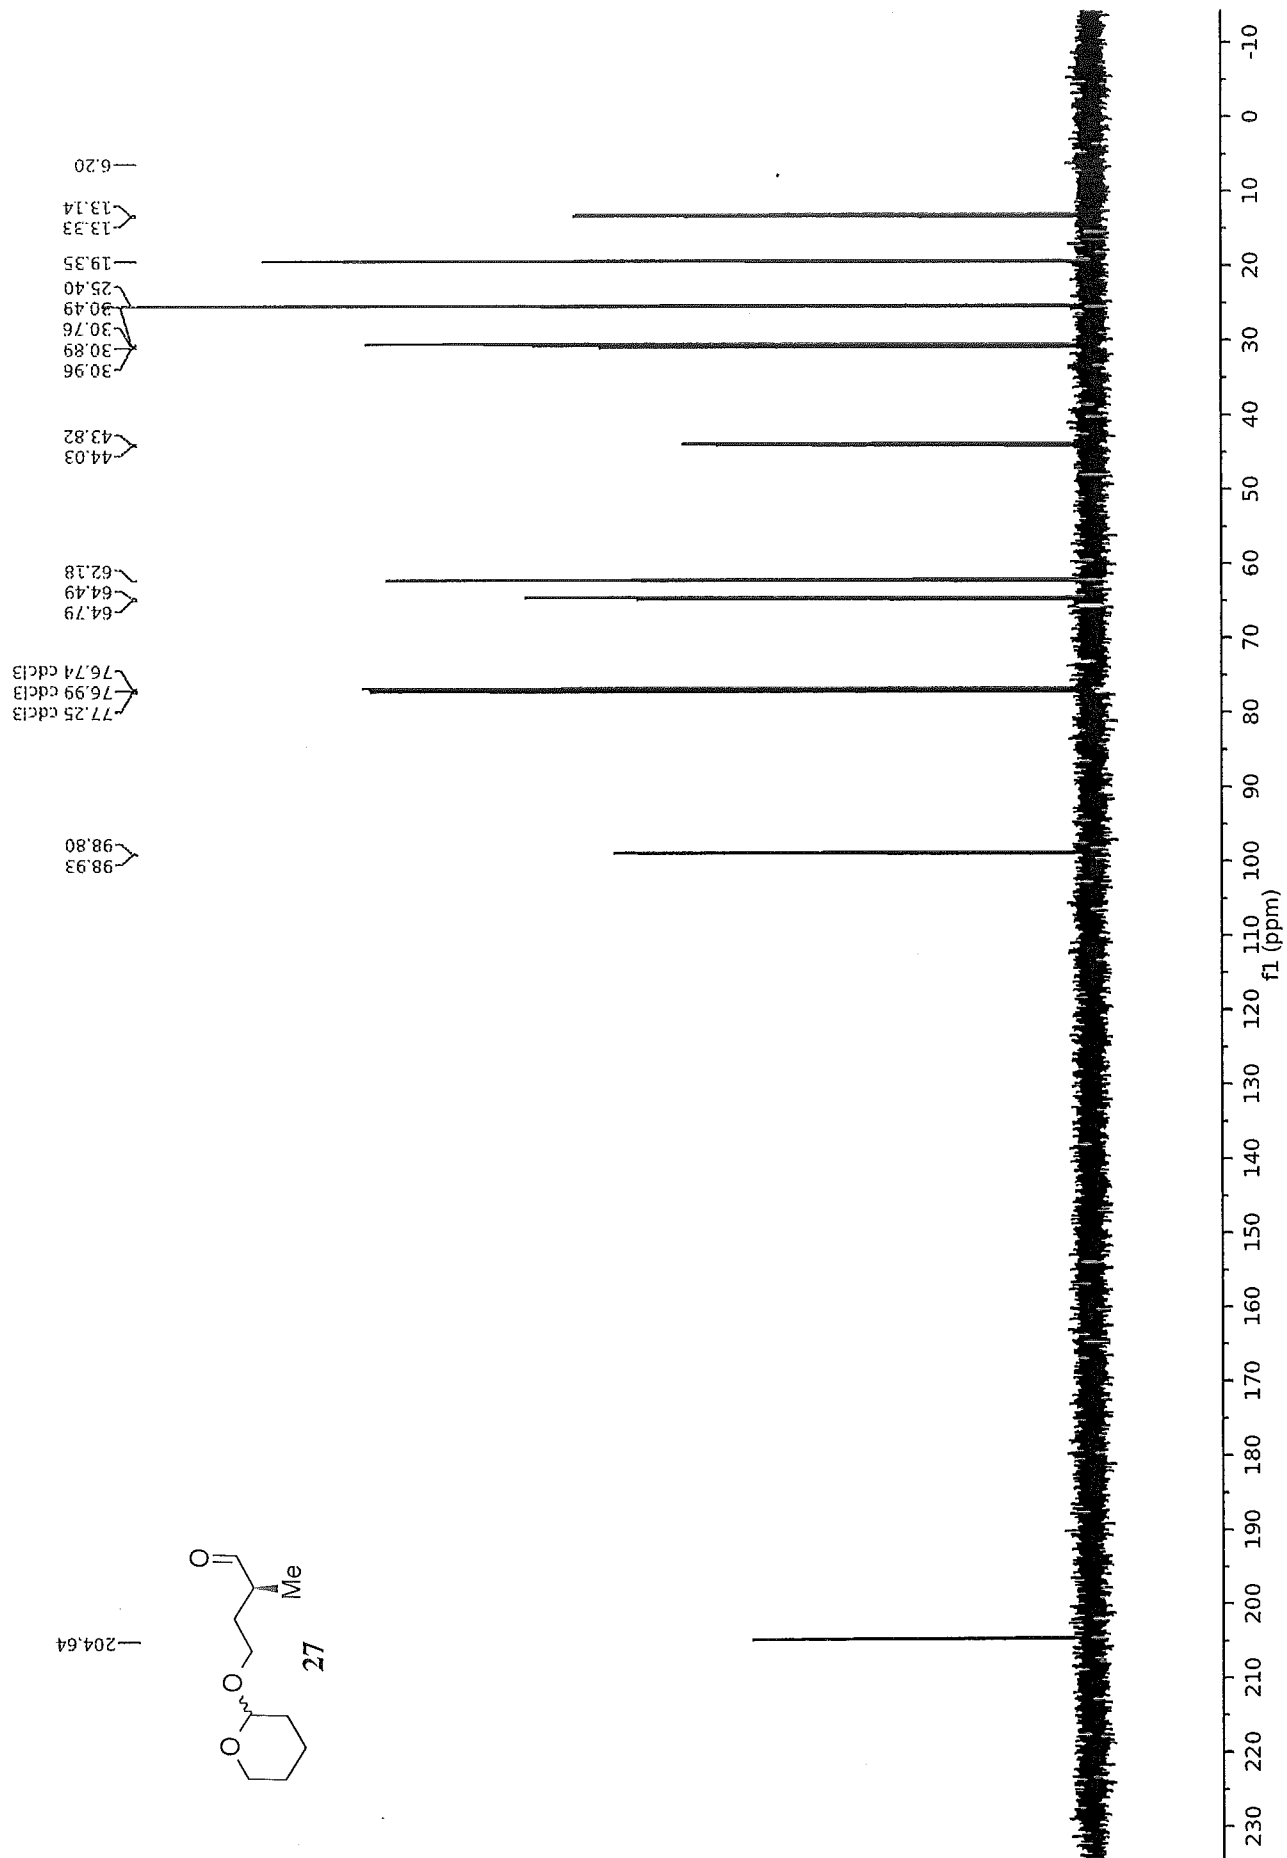

1.20  
1.22  
1.75  
1.77  
1.78  
1.80  
1.81  
1.82  
2.19  
2.20  
2.21  
2.23  
2.24  
2.26  
2.50  
2.51  
2.53  
2.54  
2.56  
2.57

4.42  
4.43  
4.45

7.26

9.67  
9.66

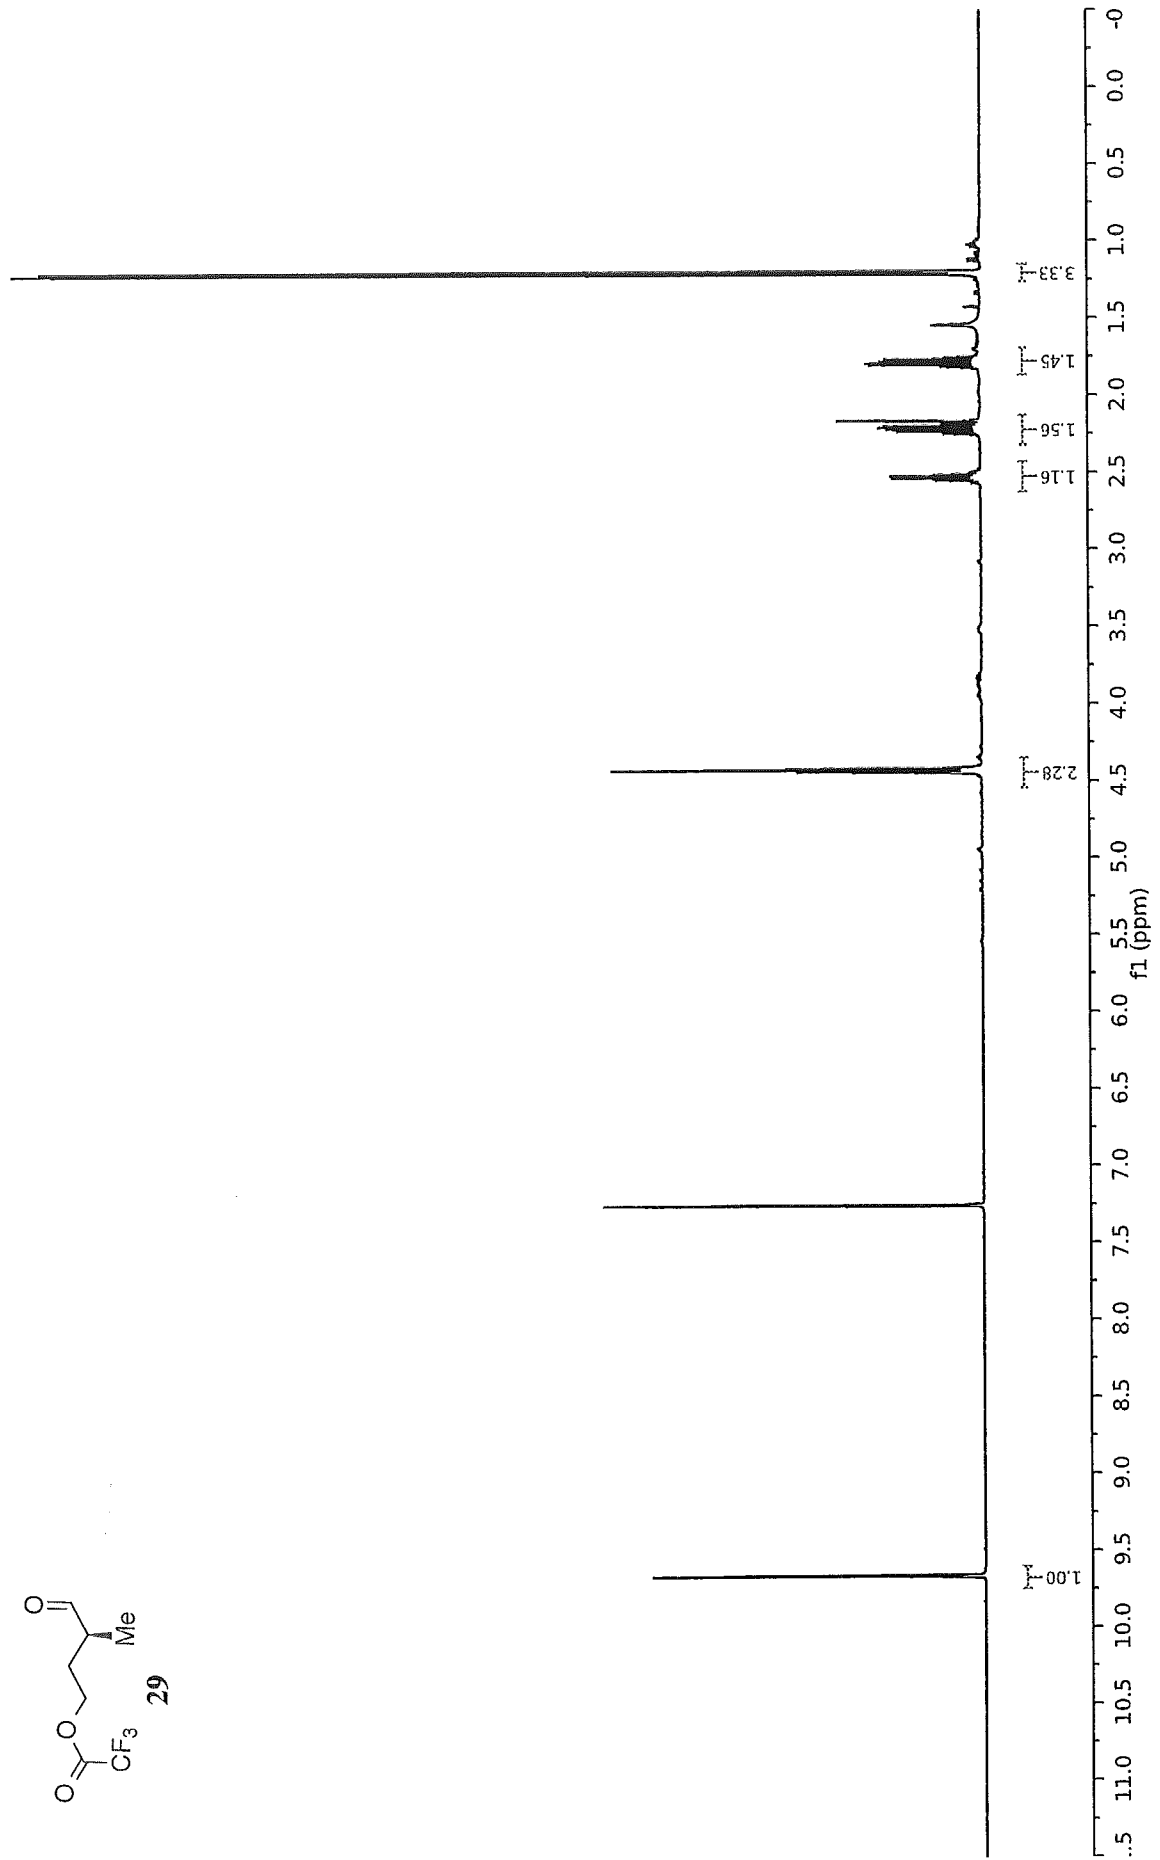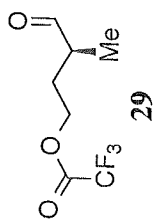

1.14  
1.14  
1.16  
1.16  
1.42  
1.43  
1.43  
1.43  
1.44  
2.28  
2.28  
2.30  
2.30  
2.32  
2.32  
2.34  
2.34  
2.59  
2.59  
2.61  
2.61  
2.63  
2.65  
2.65  
2.76  
2.76  
2.78

7.24

9.67  
9.68  
9.68

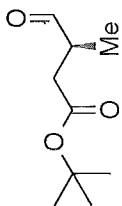

31

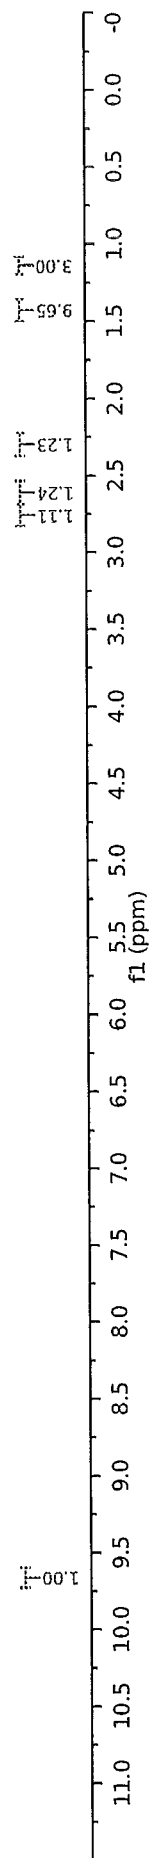

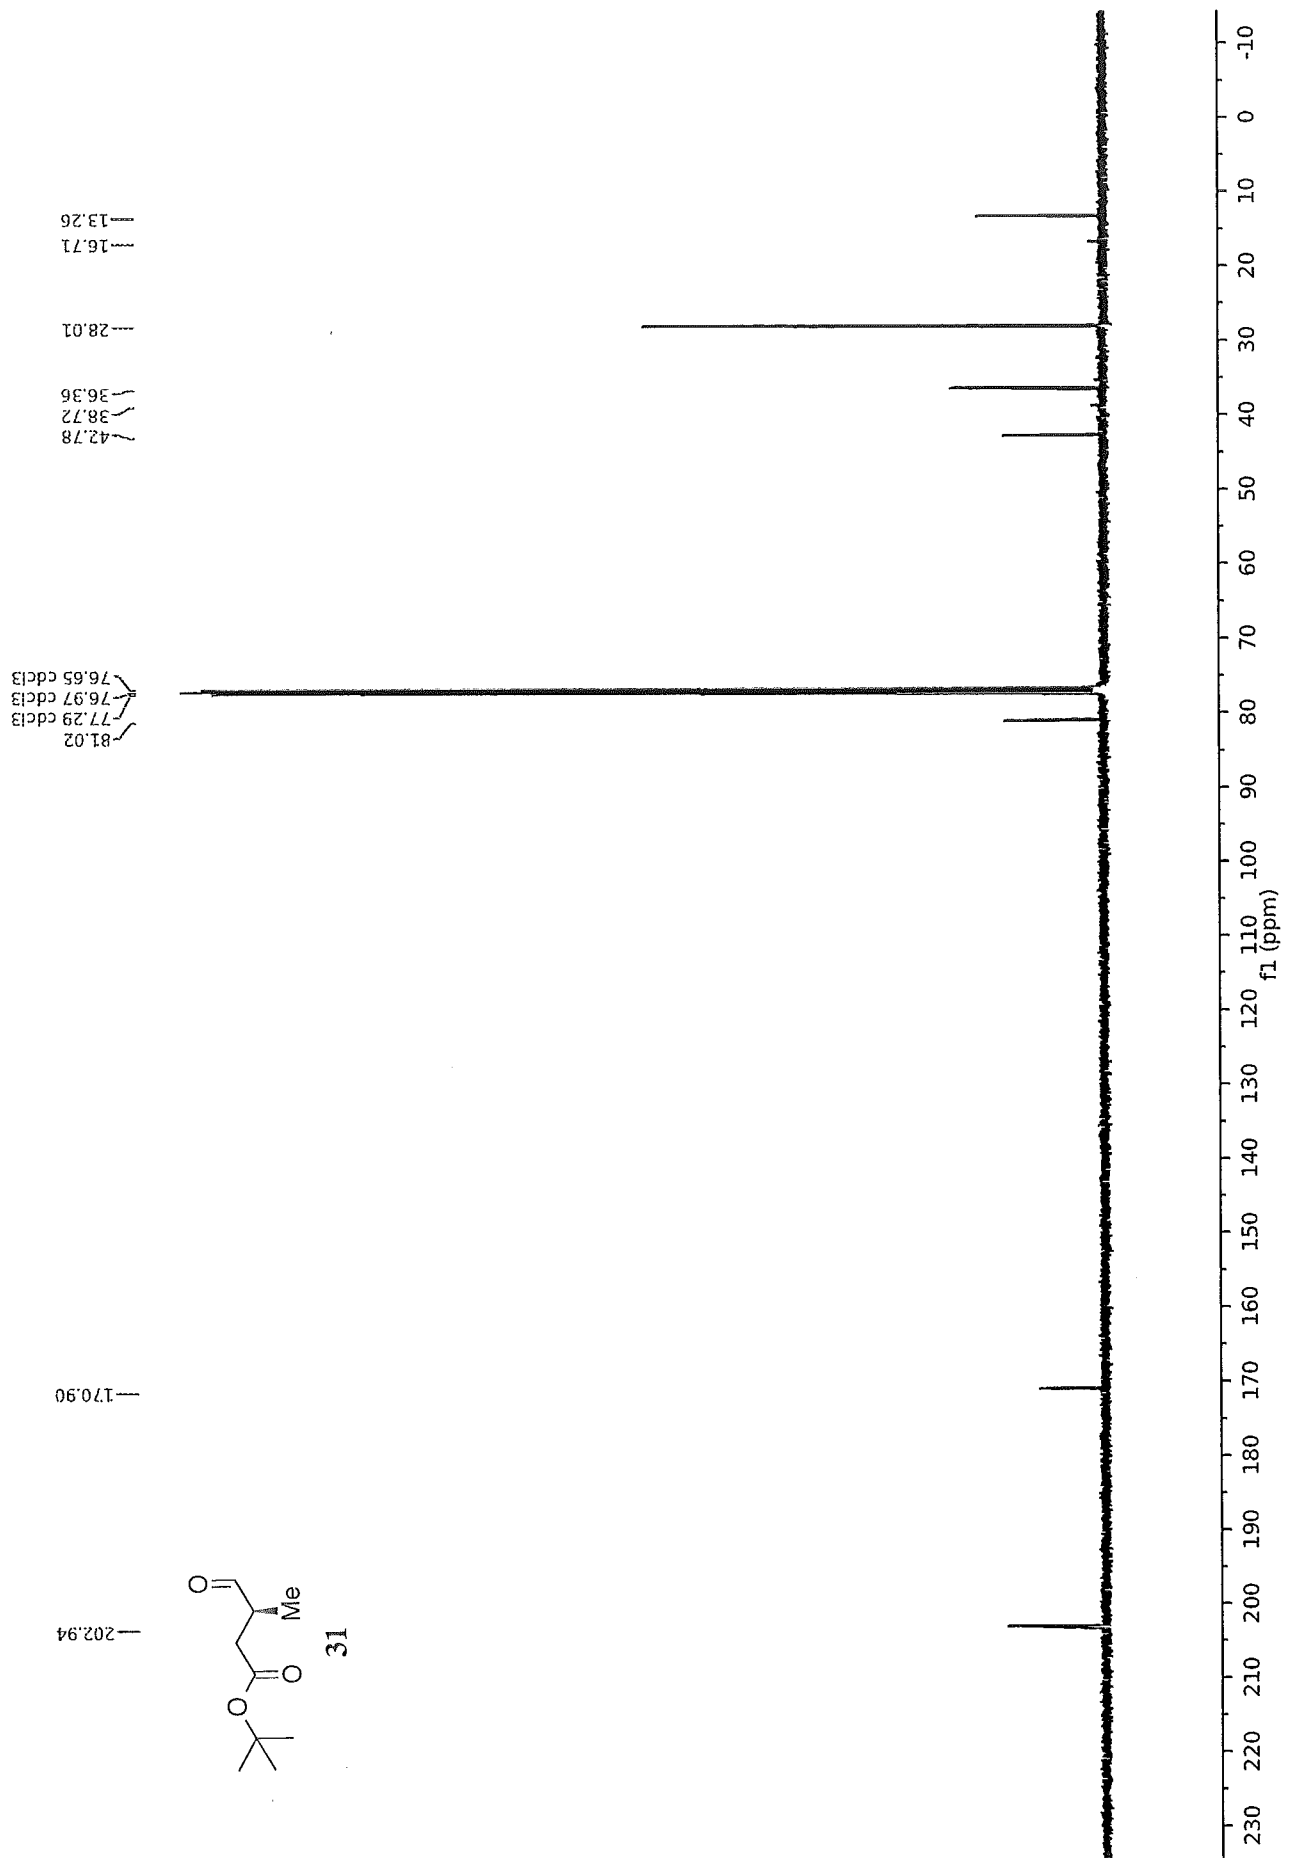

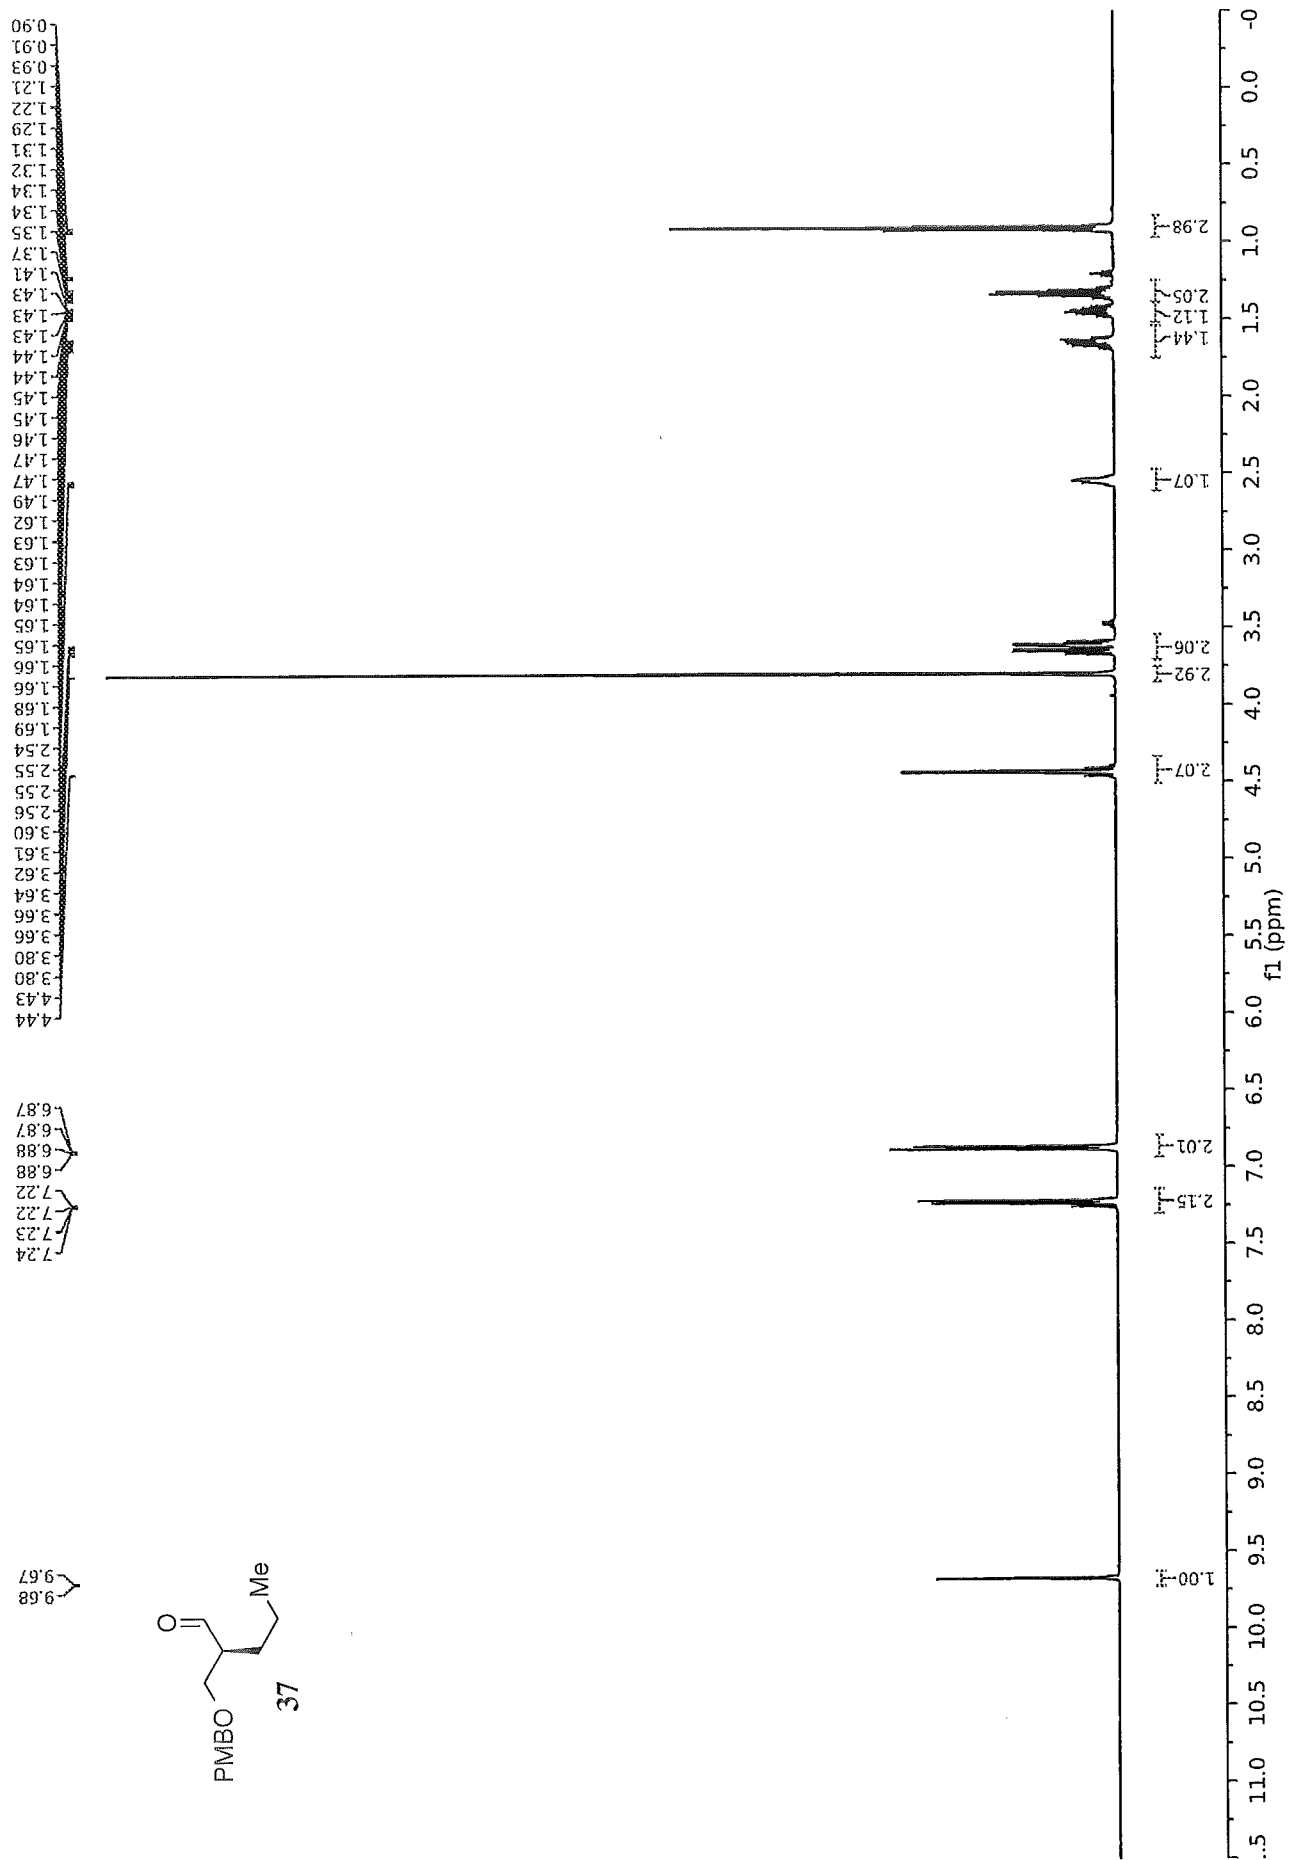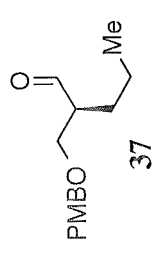

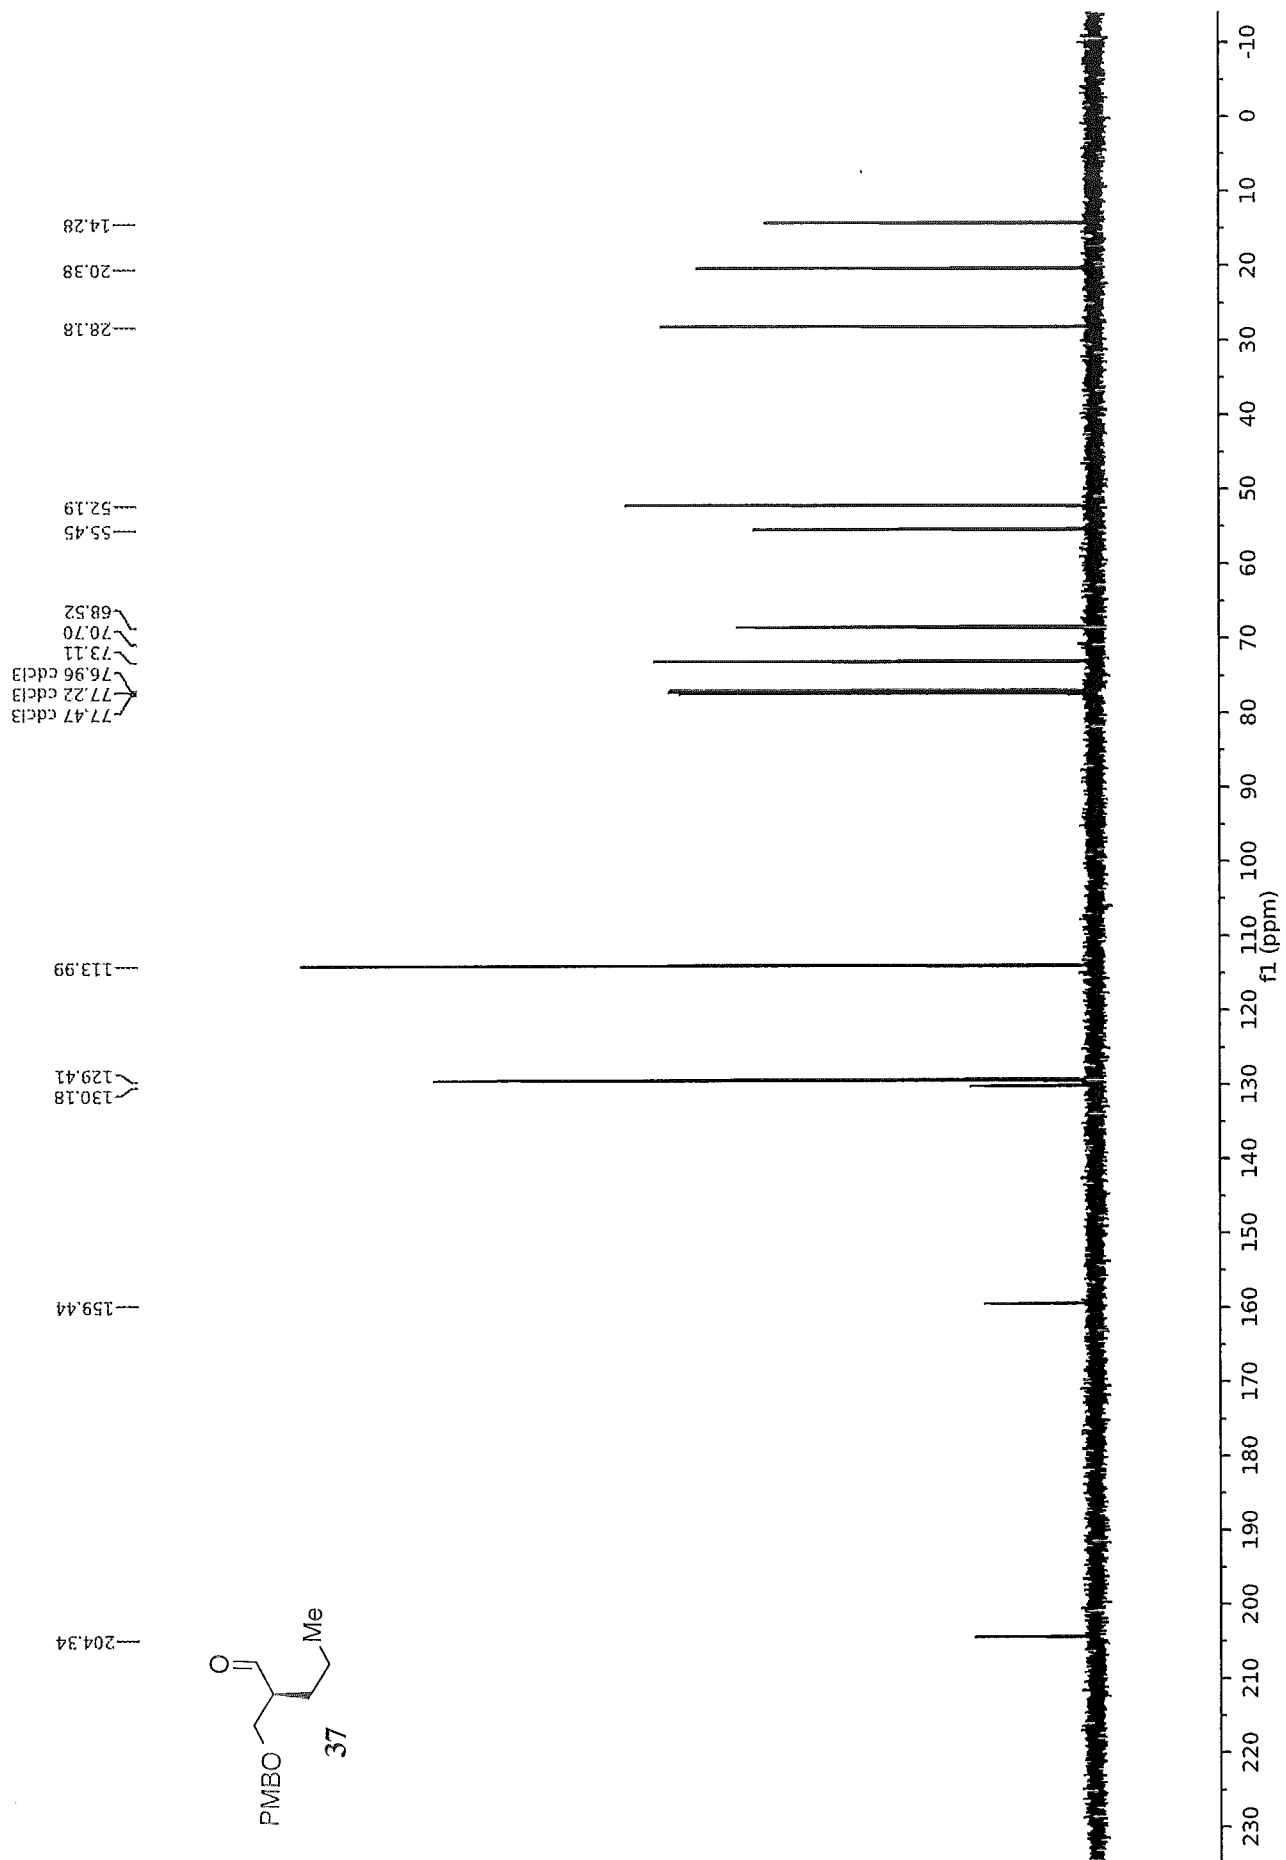

Supplement: NIHMS728340-supplement-SuppInfo.pdf [file NIHMS728340-supplement-SuppInfo.pdf]
